1 **Scar-less whole-body regeneration in the absence of a blastema**  
2 **requires cell division in the ctenophore *Mnemiopsis leidyi***  
3  
4

5  
6 Authors:

7 Julia Ramon Mateu<sup>1</sup>, Mark Q. Martindale<sup>1\*</sup>  
8

9 Affiliation:

10 <sup>1</sup>The Whitney Laboratory for Marine Bioscience, 9505 N, Ocean Shore Blvd, St.  
11 Augustine, FL 32080-8610, USA  
12

13  
14 \*Corresponding author

15 Email: [mqmartin@whitney.ufl.edu](mailto:mqmartin@whitney.ufl.edu)  
16

17 **ABSTRACT**

18 Most species of ctenophore (or “comb jelly”) possess an outstanding capacity to  
19 regenerate but the cellular and molecular mechanisms underlying this ability are  
20 unknown. We have studied wound healing and adult regeneration in the ctenophore  
21 *Mnemiopsis leidyi* and show that cell proliferation is activated at the wound site and is  
22 indispensable for whole-body regeneration. Wound healing occurs normally in the  
23 absence of cell proliferation forming a scar-less wound epithelium. No blastema is  
24 generated, rather undifferentiated cells assume the correct location of missing structures  
25 and differentiate in place. Cells originated in the main regions of cell proliferation do not  
26 seem to contribute to the formation of new structures suggesting a local source of cells  
27 during regeneration. Surprisingly, the ability to regenerate is recovered when exposure  
28 to cell-proliferation blocking treatment ends, suggesting that regenerative ability is  
29 constantly ready to be triggered and it is somehow independent of the wound healing  
30 process.

31

## 32 INTRODUCTION

33 Regeneration, the ability to re-form a body part that has been lost, is a widely shared  
34 property of metazoans (Bely and Nyberg, 2010). However, the contribution of cell  
35 proliferation, the source of regenerating tissue, and the mechanisms which pattern the  
36 replaced tissues varies greatly among animals with regenerative ability, resulting in a  
37 collection of different “modes” of regeneration (Alvarado and Tsonis, 2006; Tanaka and  
38 Reddien, 2011). The first classification of regenerative strategies was established by T.  
39 H. Morgan who initially defined two different mechanisms of rebuilding structures  
40 according to the contribution of cell proliferation: 1) *morphallaxis*, regeneration which  
41 occurs in the absence of active cell proliferation, through re-patterning of pre-existing  
42 tissue, and 2) *epimorphosis*, regeneration mediated by cell proliferation (Morgan, 1901).  
43 Epimorphic regeneration can involve the production of a blastema, a mass of  
44 undifferentiated cells that forms at the wound site from where cells proliferate and  
45 differentiate to form the missing structures (Sánchez Alvarado, 2000). The classical  
46 example of morphallactic regeneration is provided by the freshwater cnidarian polyp  
47 *Hydra*, which is able to regenerate the head after decapitation without a significant  
48 contribution from cell proliferation (Park et al., 1970; Cummings and Bode, 1984; Dübel  
49 and Schaller, 1990; Holstein et al., 1991; Chera et al., 2009). While documented cases  
50 of strict morphallaxis are very few in nature, most of the organisms with regenerative  
51 potential rely on cell proliferation (epimorphosis) – or a combination of both epimorphosis  
52 and morphallaxis – to re-form lost structures. Regenerative abilities appear to be diverse  
53 even within individual evolutionary clades. For example, regeneration of oral structures  
54 in another member of the phylum Cnidaria – *Nematostella vectensis* – is characterized  
55 by high levels of cell proliferation differing thus from the morphallactic regeneration  
56 potential in *Hydra* (Passamanek and Martindale, 2012). In planarians, whole-body  
57 regeneration is accomplished by the proliferation of pluripotent stem cells (neoblasts),  
58 the only cells in the adult with proliferative potential, which form a mass of  
59 undifferentiated cells known as the regenerating blastema (Baguna et al., 1989;  
60 Newmark and Sánchez Alvarado, 2000; Wagner et al., 2011). Annelid regeneration  
61 provides examples of both epimorphic (blastema-based) regeneration and morphallactic  
62 (tissue-remodeling based) regeneration (Bely, 2014; Özpolat and Bely, 2016), showing  
63 diversity within the Lophotrochozoa. Moreover, evidence of cell migration has been  
64 documented during regeneration of several annelid species such as the freshwater  
65 annelid *Pristina leidyi* (Zattara et al., 2016) and the marine annelid worm *Capitella teleta*,  
66 in which local (proliferating cells close to the wound site) and distant (stem cell migration)  
67 sources of cells contribute to the formation of the regenerating blastema (de Jong and  
68 Seaver, 2017). Evidence of cell migration during regeneration is also provided by the

69 hydrozoan *Hydractinia echinata* in which stem cells (i-cells) from a remote area migrate  
70 to the wound site and contribute in the formation of the blastema (Bradshaw et al., 2015).  
71 In vertebrates, regenerative potential is limited primarily to the structural or cellular level.  
72 Urodele amphibians are known for being the only vertebrate tetrapods that can  
73 regenerate amputated limbs as adults. Similar to the previous examples of epimorphic  
74 regeneration, they require cell proliferation and the formation of a blastema. However,  
75 the urodele blastema is not generated from or composed of cells of a single type, but  
76 consists of a heterogeneous collection of lineage-restricted progenitors (Kragl et al.,  
77 2009). Moreover, diversity in the source of regenerating tissue has been reported among  
78 urodeles, with myofiber dedifferentiation being an integral part of limb regeneration in the  
79 newt but not in axolotl, in which resident multipotent muscle stem cells provide the  
80 regeneration activity (Sandoval-Guzmán et al., 2014). Dedifferentiation has also been  
81 described in another species of vertebrates, zebrafish, which can regenerate both heart  
82 and bone via dedifferentiation of mature cardiomyocytes and osteoblasts respectively  
83 (Jopling et al., 2010; Knopf et al., 2011).

84         Among the animals with impressive whole-body regenerative capabilities are  
85 lobate ctenophores (comb jellies), fragile holopelagic marine carnivores that represent  
86 one of the oldest extant metazoan lineages. Ctenophora is latin for “comb bearer”,  
87 referring to eight longitudinally oriented rows of locomotory ctene (or comb) plates which  
88 they coordinately beat to propel through the water column. Ctenophores possess a highly  
89 unique body plan characterized by a biradial symmetry (with no planes of mirror  
90 symmetry) and two epithelial layers: the ectoderm and the endoderm, separated by a  
91 thick mesoglea mostly composed of extracellular matrix, but also containing several  
92 types of individual muscle and mesenchymal cells. The oral-aboral axis is their major  
93 body axis and it is characterized by the mouth at one (oral) pole and the apical sensory  
94 organ at the opposite (aboral) pole. Most ctenophores possess a pair of muscular  
95 tentacles that bear specialized adhesive cells called colloblasts, used to capture prey  
96 (Pang and Martindale, 2008) (**Figure 1C**). One of the best studied species of  
97 ctenophores is the lobate ctenophore *Mnemiopsis leidyi*, which is emerging as a new  
98 model system in evolutionary-developmental biology (Henry and Martindale, 2000;  
99 Fischer et al., 2014; Schnitzler et al., 2014; Jager and Manuel, 2016; Reitzel et al., 2016;  
100 Martindale, 2016). *M. leidyi*'s life cycle is characterized by a rapid development including  
101 a highly stereotyped cleavage program and two adult stages: the juvenile tentaculate  
102 cydippid, distinguishable for having a pair of long branching tentacles (**Figure 1A,B**), and  
103 the lobate adult form which possess two oral feeding lobes. A particular feature of  
104 ctenophore embryogenesis is that they undergo mosaic development, meaning that  
105 embryos cannot compensate for cells/structures derived from cells killed or isolated

106 during early development. If blastomeres are separated at the two-cell stage, each will  
107 generate a “half-animal,” possessing exactly half of the normal set of adult features  
108 (Freeman, 1967; Martindale, 1986). This lack of ability to replace missing parts during  
109 embryogenesis contrasts with the outstanding capacity to regenerate as adults. Both the  
110 tentaculate larval and lobate adult life stages of *M. leidyi* readily regenerate and are  
111 capable of whole-body regeneration from only a body quadrant or half (Martindale,  
112 1986).

113 It has been known for well over 80 years that ctenophores have the capacity to  
114 replace missing body parts (Coonfield, 1936; Martindale, 1986; Martindale and Henry,  
115 1996; Henry and Martindale, 2000; Tamm, 2012) but the cellular and molecular  
116 mechanisms underlying this ability are poorly understood. Is cell proliferation required  
117 for ctenophore regeneration? Is any kind of blastema-like structure formed during  
118 regeneration? What is the source and nature of cells that contribute to the regenerated  
119 structures? What is the role of the wound epidermis in regulating the future regenerative  
120 outcome? We have studied wound healing and adult regeneration in the ctenophore  
121 *Mnemiopsis leidyi* and show that cell proliferation is activated at the wound site several  
122 hours after wound healing is complete and is indispensable for the regeneration of all  
123 the structures of the cydippid's body. Wound healing occurs normally in the absence of  
124 cell proliferation forming a scar-less wound epithelium only a few hours after amputation.  
125 In both animals cut in half along the oral-aboral axis and those in which the apical organ  
126 is removed, anlage of all missing structures occurs within 48 hours and complete  
127 replacement of all cell types by 72 hours after the injury. No blastema is generated, rather  
128 undifferentiated cells assume the correct location of missing structures and differentiate  
129 in place. EdU (5-ethynyl-2'-deoxyuridine) labeling shows that in uncut animals the  
130 majority of cell divisions occur in the tentacle bulbs where the tentacles are continuously  
131 growing. In surgically challenged animals, cell division is stimulated at the wound site  
132 between 6-12 hours after injury and continues until 72 hours after injury. EdU pulse and  
133 chase experiments after surgery together with the removal of the two main regions of  
134 active cell proliferation suggest a local source of cells in the formation of missing  
135 structures. The appearance of new structures is completely dependent on cell division,  
136 however, surprisingly, the ability to regenerate is recovered when exposure to cell-  
137 proliferation blocking treatment ends, suggesting that the onset of regeneration is  
138 constantly ready to be triggered and it is somehow independent of the wound healing  
139 process. This study provides some first-time insights of the cellular mechanisms involved  
140 in ctenophore regeneration and paves the way for future molecular studies that will  
141 contribute to the understanding of the evolution of the regenerative ability throughout the  
142 animal kingdom.

## 143 RESULTS

### 144 Whole-body regeneration in *Mnemiopsis leidyi* cydippids

145 Although the regenerative response has been studied previously in *M. leidyi* (Coonfield,  
146 1936; Martindale, 1986; Martindale and Henry, 1996; Henry and Martindale, 2000;  
147 Tamm, 2012) we first characterized the sequence of morphogenic events during cydippid  
148 wound healing and regeneration to provide a baseline for further experimental  
149 investigations. For this, two types of surgeries – representing the replacement of all the  
150 structures and cell types of the cydippid's body (e.g. apical organ, comb rows, tentacle  
151 bulbs and tentacles) – were performed (**Figure 1D**). The timing and order of formation  
152 of missing structures was assessed by *in vivo* imaging of the regenerating animals at  
153 different time points along the regeneration process.

154

#### 155 *Wound healing*

156 To assess the mechanism of wound healing, juvenile cydippids were punctured  
157 generating a small epithelial gap (**Figure 2A**) (Imaging of larger wound healing events  
158 provided to be too difficult to document visually). Within minutes after puncture, the  
159 edges of the gap increased their thickness indicating the start of the wound closure. The  
160 next phase of wound closure was characterized by the migration of a small number of  
161 cells coming from deep levels of the mesoglea (underneath the epithelial layer) to the  
162 edges of the wound (**Figure 2B, Supplementary Figure 1**). Interestingly, while the  
163 migration of cells from the mesoglea to the wound site was quite evident, the migration  
164 of epithelial cells across the wounded area was not observed. Once the migrating deep  
165 cells adhered to the gap edges, they started to extend filopodia laterally towards the  
166 adjacent cells. The diameter of the gap was progressively reduced as the connections  
167 between filopodia of marginal cells pulled the edges of the wound together (**Figure 2C**).  
168 When the diameter of the gap was significantly reduced, the cells at the gap margins  
169 started to extend filopodia not only to adjacent cells but also to cells from the opposite  
170 edge of the wound. At this stage, multiple filopodia were detected emerging from a single  
171 cell (**Figure 2D**). Filopodia from all the edges of the wound eventually met forming a  
172 network of filaments that sealed the gap (**Figure 2E**) resulting in a scar-free epithelium  
173 within approximately 1.5-2 hours after the puncture.

174

#### 175 *Events during whole-body regeneration of the *Mnemiopsis leidyi* cydippid following* 176 *bisection through the oral-aboral axis*

177 Cydippids were bisected through the oral-aboral axis retaining the whole apical organ in  
178 one of the halves – bisected cydippids with a complete intact apical organ regenerate  
179 into whole animals in a higher percentage of the cases compared to bisected animals

180 with half apical organ (Martindale, 1986). Bisected cydippids containing half of the set of  
181 structures present in intact cydippids (four comb rows and one tentacle) and a complete  
182 apical organ were left to regenerate in 1x filtered sea water (1x FSW) (n>100) at 22°C.  
183 Wound closure was initiated rapidly after bisection with the edges of the wound forming  
184 a round circumference that continued to reduce in diameter until meeting and was  
185 completed within 2 hours after bisection (hab). No scar or trace of the original wound  
186 was evident after this time. About 16 hab, four ciliated furrows – which connect the apical  
187 organ with the comb rows – appeared on a surface epithelium at the aboral end of the  
188 cut site (**Figure 3B**). A large blastema or mass of undifferentiated cells did not appear at  
189 the cut site. Rather, accumulations of cells were detected forming the primordia of all  
190 four of the future comb rows in a deeper plane at the end of each ciliated furrow. By 24  
191 hab, the first comb plates appeared, first in the two most external (closer to existing comb  
192 rows) comb rows and later in the two internal rows (**Figure 3C**). Comb plate formation  
193 did not follow a consistent pattern initially. The correct orientation of comb plates and  
194 coordination of their beating was accomplished after a number of comb plates were  
195 formed (**Figure 3D** surface, down), as has been described previously (Tamm, 2012).  
196 Within 40 hab, coordinated comb plates were beating in all four regenerating comb rows  
197 and the primordia of tentacle bulb had emerged in the middle of the four comb rows. By  
198 48 hab, regeneration of the missing structures of the cydippid body was essentially  
199 completed including the formation of the tentacle growing from the tentacle bulb (**Figure**  
200 **3E**). At 96 hours after bisection, the regenerated tentacle was long enough to actively  
201 catch prey. The cut side continued to grow and within a day or two it was  
202 indistinguishable from the uncut side (**Figure 3F**).

203

204 *Events during regeneration of the Mnemiopsis leidyi cydippid following apical organ*  
205 *amputation*

206 Cydippids in which the apical organ was amputated were left to regenerate in 1x FSW  
207 (n>100) at 22°C. The cut edges of the wound met and sealed within 30-60 minutes of  
208 the operation and the lesion was completely healed around 2 hours post amputation  
209 (hpa). Between 6 and 12 hpa, cells congregated under the wounded epithelium forming  
210 the primordia of the future apical organ (**Figure 4E-F'**). Extension of the ciliated furrows  
211 from each comb row towards the wound site could be spotted around 12 hpa. Within 24  
212 hpa, cells at the wound site started to differentiate into the floor of the apical organ and  
213 its supporting cilia (**Figure 4G-H'**). At 48 hpa all the components of the statolith, including  
214 the supporting cilia, the balancing cilia and lithocytes, were formed (**Figure 4I-J'**). At  
215 approximately 60 hpa the complete set of structures forming the apical organ were  
216 regenerated with the exception of the polar fields (**Figure 4K-L'**). Within 3 days after



217 surgery, the polar fields had formed, and animals were indistinguishable from control  
218 animals of the same size.

219

## 220 **Cell proliferation in intact cydippids**

221 To identify areas of cell proliferation in juvenile *M. leidy*, intact cydippids between 1.5 –  
222 3.0 mm in diameter were labelled with the thymidine analog 5-ethynyl-20-deoxyuridine  
223 (EdU), which is incorporated into genomic DNA during the S-phase of the cell cycle (Salic  
224 and Mitchison, 2008; Chehrehasa et al., 2009; Alié et al., 2011; Schnitzler et al., 2014)  
225 (**Figure 5A**). Cydippids incubated with EdU during a 15-minute pulse showed a pattern  
226 of cell division characterized by two main regions of active cell proliferation  
227 corresponding to the two tentacle bulbs (**Figure 5B'**). Higher magnifications of these  
228 structures showed EdU staining specifically concentrated at the lateral and median  
229 ridges of the tentacle bulb. Two symmetrical populations of densely packed cells were  
230 observed at the aboral extremity of the lateral ridges, previously characterized by Alié et  
231 al. (2011) as the aboral/external cell masses (a.e.c.) (**Figure 5C'**). EdU labeling was also  
232 found in some cells of the apical organ and few isolated cells along the pharynx and  
233 under the comb rows (n=20, **Figure 5B-D'**). To detect dividing cells in M phase of the  
234 cell cycle we performed anti-phospho-histone 3 (anti-PH3) immunolabelings in intact  
235 cydippids. The spatial pattern and distribution of PH3 labeling closely matched the one  
236 described for EdU incorporation, although PH3+ cells were always about 10% less  
237 numerous than the EdU labeled cells, suggesting that the duration of the M phase is  
238 much shorter than the S phase (n=10, **Figure 5B'', C'', D''**).

239 In order to track the populations of proliferating cells over time in intact animals  
240 we performed EdU pulse-chase experiments consisting in a 15-minute EdU incubation  
241 (pulse) and a chase of different times followed by visualization (**Figure 5A**). After a 24h  
242 chase, the pools of proliferating cells had migrated from the tentacle bulb through the  
243 proximal region of the tentacles, although some EdU+ cells were still detected at the  
244 tentacle sheath. Increased labeling of nuclei in the apical organ, pharynx and comb rows  
245 was also observed (n=10, **Figure 5E-F'**). Following a 48h chase, the population of  
246 proliferating cells that was originally in the tentacle bulbs at the time of labeling had  
247 migrated to the most distal end of the tentacles, but only a few cells associated with the  
248 tentacle bulb showed long-term EdU retention, suggesting that there is a resident  
249 population of slowly dividing stem cells in the tentacle bulb as previously reported by Alié  
250 et al. (2011). The number of EdU+ nuclei along the pharynx, the apical sensory organ  
251 (specifically in the apical organ floor) and comb rows was considerably increased  
252 compared to the 24h chase condition (n=10, **Figure 5G-G'**), suggesting that there are  
253 either small populations of EdU labeled cells restricted to those areas that had



254 proliferated during the chase period, or that cells migrated in to those regions from  
255 regions of high mitotic density, or a combination of both events.

256

### 257 **Cell proliferation is activated during ctenophore regeneration**

258 Regeneration can be classified into two main categories according to the involvement of  
259 cell proliferation: epimorphosis, in which regeneration is mediated by active cell  
260 proliferation, and morphallaxis, in which regeneration can occur in the absence of cell  
261 proliferation, due to the remodeling of pre-existing cells (Sánchez Alvarado, 2000). In  
262 order to determine the role of cell proliferation in ctenophore regeneration we performed  
263 a series of EdU experiments in regenerating cydippids. A 15-minute exposure to EdU at  
264 different times after surgical cutting was evaluated after two types of surgeries that  
265 required different regenerative responses: a bisection through the oral-aboral axis and  
266 an apical organ ablation. The dynamics of cell proliferation at the wound site were  
267 quantified by calculating the ratio of EdU+ nuclei to total nuclei at different time-points  
268 following surgery (**Figure 6B** and **Figure 7B**).

269         Following oral-aboral bisection, EdU+ nuclei were first detected at the wound site  
270 between 6 and 12 hours after bisection (hab). There was some variability in the presence  
271 of EdU+ nuclei at 6 hab – with some specimens having fewer EdU+ nuclei at the wound  
272 site than others – however the presence of EdU+ cells was consistent in all the analyzed  
273 individuals by 12 hab. The few EdU+ cells at the early stages were scattered all along  
274 the cut site, but no aggregation of cells was observed (n=7, **Figure 6C-C'**). The number  
275 of EdU+ nuclei at the wound site slightly increased between 12 and 24 hab reaching a  
276 maximum at 24hab (**Figure 6B**), when EdU+ cells appeared concentrated in discrete  
277 areas forming the primordia of the regenerating tissues (the tentacle bulb and comb  
278 rows) (n=27, **Figure 6D-D'**). By 48 hab, the % of EdU+ nuclei had decreased as the  
279 cells started to differentiate into the final structures. EdU+ nuclei appeared confined into  
280 the regenerating comb rows and tentacle bulb, already distinguishable by nuclei staining  
281 (n=12, **Figure 6E-E'**). At 72 hab, the number of EdU+ nuclei at the comb rows was  
282 considerably reduced and these were concentrated at the oral end of the regenerating  
283 structures, where oral portions of structures are generated prior to aboral regions. For  
284 example, proliferative cells were no longer detected at the aboral end of the comb rows  
285 where cells had already differentiated into comb plates. In contrast, EdU+ cells at the  
286 regenerating tentacle bulb were abundant but appeared organized at the aboral  
287 extremity forming the two symmetrical populations of cells characteristic of the structure  
288 of the tentacle bulb (n=15, **Figure 6F-F'**). By 96 hab, when major repatterning events of  
289 regeneration were completed, EdU+ cells were only detected at the regenerated tentacle  
290 sheath forming the pattern of cell proliferation previously described in the tentacle bulbs

291 of intact cydippids (**Figure 4**) (n=5, **Supplementary figure 3A-A'**). In combination with  
292 EdU incorporation experiments, anti-PH3 immunostaining was performed at selected  
293 time-points following bisection. PH3+ cells were detected in the regenerating comb rows  
294 and tentacle bulb at 24 hab and 48 hab (**Supplementary figure 4A-B'**) consistent with  
295 the EdU incorporation, although the number of PH3+ cells was always less numerous  
296 than the EdU+ cells.

297 EdU labeling was also detected at the wound site of regenerating cydippids after  
298 apical organ amputation. Consistent with the oral-aboral bisection surgeries, EdU+ cells  
299 were first detected at 12 hpa suggesting that the start of the cell proliferation response  
300 occurred between the 6 and 12 hpa time points. A peak of cell proliferation was also  
301 observed at 24 hpa (**Figure 7B**), with EdU+ cells localized at the primordia of the apical  
302 organ, specifically in the apical organ floor and in the surrounding tissue including the  
303 regenerating comb rows adjacent to the cut site (n=15, **Figure 7E-F'**). The number of  
304 proliferating cells slightly decreased at 48 hpa when EdU+ cells were concentrated in  
305 the regenerating apical organ and were no longer found in the tissues near the wound  
306 site (n=20, **Figure 7G-H'**). By 72 hpa, the EdU+ nuclei were scarce and localized mostly  
307 along the polar fields in some specimens, while EdU+ nuclei were completely absent in  
308 other individuals at the same time-point (n=6, **Supplementary figure 3B-C'**). Anti-PH3  
309 immunostaining showed presence of M-phase cells at the regenerating area at both 24  
310 hpa and 48 hpa. Similar to half body regeneration, while only very few cells were labeled  
311 with anti-PH3, the pattern was consistent with the EdU labeling being the PH3+ cells  
312 more numerous at 24 hpa than 48 hpa (**Supplementary figure 4C-D'**).

313 Interestingly, for both types of surgeries, proliferating cells were not organized in  
314 a compacted mass of “blastema-like” cells from where new tissue formed. In contrast,  
315 proliferating cells were very few and scattered throughout the wound site at early time-  
316 points after surgery – when a blastema is normally formed in animals with epimorphic  
317 regeneration – and appeared more abundant and directly confined at the correct location  
318 of missing structures at later stages of regeneration, where they differentiated in place.

319

### 320 **Cells participating in the regenerative response appear to arise locally**

321 To investigate the source of cells that contribute to the formation of new tissue during  
322 ctenophore regeneration we performed a series of EdU pulse and chase experiments in  
323 regenerating cydippids. This technique has been successfully used in different model  
324 systems as a strategy to indirectly track populations of proliferating cells and determine  
325 its contribution to the formation of new structures (de Jong and Seaver, 2017; Planques  
326 et al., 2019). With the aim of determining whether cells proliferating before amputation  
327 contribute to the formation of new tissues, uncut cydippids were incubated in EdU, which

328 was incorporated into cells undergoing the S-phase of cell cycle. After a 15-minute pulse,  
329 EdU incorporation was blocked with several washes of thymidine and 1x FSW. Following  
330 the washes, apical organ amputations and oral-aboral bisections were performed and  
331 animals were left to regenerate in 1x FSW. The location of EdU+ cells was subsequently  
332 visualized at 24 and 48 hours after injury. In combination to EdU detection, an  
333 immunostaining against PH3 was performed in order to detect cells that were actively  
334 dividing in the animal immediately before fixation (**Figure 8A**).

335 No EdU+ cells were detected at the wound site at 24h (n=30) nor 48h (n=10) after  
336 bisection (**Figure 8B-C'**). EdU labeling at the tentacle bulb resembling the pattern of  
337 cells migrating from the tentacle bulb along the tentacle previously described (**Figure**  
338 **5F-F'**) confirmed that the chase worked properly (**Figure 8B**). Moreover, presence of  
339 PH3+ cells were observed at the regenerating area indicating active cell division at the  
340 moment of fixation (**Figure 8B'' and 8C''**). Following apical organ amputation, few EdU+  
341 nuclei were detected at the area of apical organ regeneration although the EdU signal  
342 was very weak, suggesting that these cells were the result of multiple rounds of division  
343 (n=13, **Figure 8D-D''**). After a 48h chase, few bright EdU+ nuclei were detected at the  
344 apical organ suggesting that S-phase cells from the uncut tissue might contribute to the  
345 formation of the apical sensory organ at later stages of regeneration (n=12, **Figure 8E-**  
346 **E''**). Presence of PH3+ cells at the regenerating apical organ confirmed active cell  
347 division at the apical organ area (**Figure 8E'-E''**). Taken together, these results show a  
348 minor contribution of proliferative cells originating in distant pre-existing proliferative  
349 tissue such as the tentacle bulbs to the formation of new structures.

350 Expression patterns determined through *in-situ* hybridization have revealed  
351 spatially restricted expression of the stem cell gene markers *Piwi*, *Vasa*, *Nanos* and *Sox*  
352 within areas of cell proliferation including the tentacle bulbs, in both juvenile cydippid and  
353 adult stages (Alié et al., 2011; Reitzel et al., 2016; Schnitzler et al., 2014). On the other  
354 hand, the ctenophore group of Beroids do not possess tentacles at any stage of their life  
355 cycle and they are the only group of ctenophores that have lost the ability to regenerate  
356 (Martindale, 2016). Based on these observations, it was hypothesized a role of tentacle  
357 bulbs as putative “stem cell niches” source of new cells during regeneration. To test this  
358 hypothesis, we physically removed both tentacle bulbs of juvenile cydippids and  
359 assessed they ability to regenerate. Two days after amputation all animals had  
360 regenerated all the cell types of the tentacle bulb (n>100, **Figure 9A-C'**). EdU labeling  
361 at different time-points after amputation showed activation of cell proliferation during  
362 tentacle bulb regeneration, consistent with the other two types of surgeries analyzed.  
363 EdU+ nuclei were first detected at the distal end of the endodermal canals at 18 hpa  
364 (n=10, **Figure 9E-E''**). At 24 hpa the number of EdU+ cells had increased, and they were

365 mainly organized forming the primordia of tentacle bulbs although some EdU+ cells were  
366 still detected at the tip of the endodermal canal connecting to the tentacle bulbs in  
367 formation (n=20, **Figure 9F-F''**). By 48 hpa, EdU+ nuclei appeared organized in the  
368 characteristic pattern of intact tentacle bulbs (**Figure 5B'** and **5C'**), and they were not  
369 detected at the endodermal canals any more (n=20, **Figure 9G-G''**). In addition, animals  
370 in which both tentacle bulbs and apical organ were removed, were able to regenerate all  
371 the missing structures (data not shown). These data argue strongly that the tentacle  
372 bulbs are not the source of multipotent stem cells required for the successful  
373 regenerative response in tentaculate ctenophores and point to a local source of cells in  
374 the formation of new structures.

375

### 376 **Cell proliferation is strictly required for ctenophore regeneration**

377 Having demonstrated that cell proliferation is activated during ctenophore regeneration,  
378 our next aim was to address the requirement of cell proliferation in the process of  
379 regeneration. Juvenile cydippids were exposed to hydroxyurea (HU) treatments, a drug  
380 that inhibits cell proliferation by blocking the ribonucleotide reductase enzyme and  
381 thereby preventing the S-phase of cell cycle (Young and Hodas, 1964). We first  
382 performed a dose-response test experiment in order to set the working concentration of  
383 HU in which animals could be continuously incubated during the complete period of  
384 regeneration with no significant disruption of their fitness. Concentrations of 20, 10 and  
385 5mM HU were tested over a 72-hour time course. Incubations in 20 and 10mM HU were  
386 toxic and caused the degeneration and eventually death of most of the animals during  
387 the first 24 hours of incubation (data not shown). Incubations in 5mM HU were much less  
388 harmful; cydippids maintained a good condition swimming normally with no cell death  
389 over the 72-hour time course. We therefore decided to set 5mM HU as the working  
390 concentration for the cell proliferation inhibitor experiments. We then assessed the  
391 efficacy of that drug concentration in blocking cell proliferation in intact cydippids. Intact  
392 cydippids were incubated in 5mM HU for 24 and 72 hours and then incubated for 15  
393 minutes with EdU as previously described (**Supplementary figure 6A**). At 24 hours of  
394 HU incubation, there was no detectable incorporation of EdU as compared with control  
395 cydippids, which showed the characteristic pattern of cell proliferation described in  
396 **Figure 5 (Supplementary figure 6B-C')**. Inhibition of cell proliferation was maintained  
397 72 hours after continuous HU incubation, as shown by the total absence of EdU+ cells  
398 in treated cydippids (**Supplementary figure 6D-E'**). Finally, we evaluated the effect of  
399 the drug during regeneration in dissected cydippids. Cydippids bisected through the  
400 aboral-oral axis and cydippids in which apical organ was amputated were exposed to a  
401 continuous incubation of 5mM HU from 0 to 72 hours after surgery. None of the bisected

402 cydippids had regenerated at 72 hours following HU treatment (n=75, **Figure 10D-E'**).  
403 Wound closure and healing occurred normally as shown by the continuous epidermal  
404 layer covering the wound (**Figure 10E**), but no sign of formation of the missing structures  
405 (tentacle bulb and comb rows) was observed. Likewise, none of the apical organ  
406 amputated cydippids had regenerated any of the structures/cell types of the missing  
407 apical organ at 72 hours following HU treatment, although the wound had correctly  
408 healed (n=55, **Figure 10H-J'**). Although HU treated animals failed to regenerate any of  
409 their missing structures, an aggregation of cells could be observed at the wound site  
410 (**Figures 10E** and **10J'**). These accumulations of quite large round-shaped cells could  
411 correspond to undifferentiated cells ready to re-form the missing structures but not able  
412 to proceed due to the blocking of cell proliferation. Importantly, the absence of EdU  
413 incorporation in dissected cydippids treated with HU confirmed that cell proliferation was  
414 completely suppressed (**Supplementary figure 6I-J'**). From these observations we  
415 concluded that regeneration was impaired due to the absence of cell proliferation,  
416 therefore, cell proliferation is indispensable for ctenophore regeneration to proceed in a  
417 normal way.

418

#### 419 **Regenerative ability is recovered after HU treatment ends**

420 Hydroxyurea has been shown to be reversible in cell culture following removal of the  
421 inhibitor (Adams and Lindsay, 1967) (**Figure 11A**). HU treatments on dissected  
422 cydippids showed that wound healing occurs normally without cell division. In order to  
423 determine whether regeneration could be initiated in HU treated animals we took  
424 dissected cydippids that had been exposed to HU over 48 hours, washed them in 1x  
425 filtered sea water (1x FSW) to remove the inhibitor, and then followed their development  
426 for 48 hours to check for any ability to regenerate missing cell types (**Figures 11B and**  
427 **11E**). Surprisingly, 36 out of 94 bisected cydippids (38%) had regenerated all the missing  
428 structures (comb rows, tentacle bulb and tentacle) 48 hours after HU had been removed  
429 (**Figure 11D-D''**). 58 out of 94 bisected cydippids (62%) showed some signs of  
430 regeneration but ultimately remained as “half animals”, suggesting that these animals  
431 were not healthy enough to complete the regeneration process (Bading et al., 2017).  
432 (Note that these animals were not fed during the treatment (2 days) or recovery period  
433 (2 additional days)). On the other hand, 100% of the cydippids in which the apical organ  
434 was surgically removed and had been treated with HU for 48 hours, regenerated all the  
435 normal cell types of the apical organ (n=51, **Figure 11H-I'**). Moreover, bisected cydippids  
436 in which HU was added 4 hab (n=25) – when wound healing is already completed – and  
437 12 hab (n=25) – when cells at the wound site have already begun to cycle – fail to  
438 regenerate the missing structures (data not shown). Altogether, these results show that



439 ctenophore regeneration can be initiated over 48 hours after wound healing is complete,  
440 hence, wound healing and regeneration appear to be two relatively independent events  
441 which can take place separately in time.

442

## 443 **DISCUSSION**

444 In this study, we provide a detailed morphological and cellular characterization of wound  
445 healing and regeneration in the ctenophore *Mnemiopsis leidyi*. Wound closure is initiated  
446 immediately after injury, with the edges of the wound forming a round circumference that  
447 moves over the underlying mesoglea as it continues to reduce in diameter until they meet  
448 and forming a scar-less wound epithelium by 2 hours following injury. Two main  
449 mechanisms seem to be pivotal for ctenophore wound closure: active cell migration of  
450 cells from the mesoglea underneath the epithelium upwards to the edges of the wound;  
451 and dynamic extension of filopodia by the leading-edge epithelial cells in order to zipper  
452 the wound edges together. Cell migration and formation of actin-based cellular  
453 protrusions have been described during wound closure in multiple systems (Begnaud et  
454 al., 2016), however, slight differences in those mechanisms have been observed in  
455 ctenophore wound healing. First, cell migration takes place in a “deep to surface”  
456 direction instead of a lateral direction, suggesting that only specific cell-types from the  
457 mesoglea, such as mesenchymal cells, have the ability to migrate and contribute to gap  
458 closure. Second, wound-edge cells in ctenophores organize their cytoskeleton in spike-  
459 shaped filopodia rather than in plate-like extensions (lamellipodia), which happen to be  
460 the most common type of cellular protrusions among different model systems of wound  
461 healing, including the cnidarian *Clytia* (Kamran et al., 2017). Despite these minor  
462 differences, the fact that common mechanisms of wound closure are shared between  
463 early branching phyla like ctenophores and cnidarians and bilaterians (including  
464 vertebrates) proves the ancient origin of wound healing mechanisms as a strategy to  
465 maintain epithelium integrity. Wound healing in *M. leidyi* occurs through changes in cell  
466 behavior and occurs normally in the absence of cell proliferation. This observation is  
467 consistent with the majority of animal models of regeneration found in cnidarians (Singer,  
468 1971; Passamaneck and Martindale, 2012; Bradshaw et al., 2015; Amiel et al., 2015;  
469 Kamran et al., 2017) as well as with the more phylogenetically distantly-related marine  
470 annelid worm *Platynereis dumerilii* (Planques et al., 2019). Following wound healing and  
471 prior to activation of cell proliferation in *M. leidyi*, there is remodeling of the tissue  
472 surrounding the wound and small numbers of round-shaped cells sparsely congregate  
473 at the wound site suggesting a reorganization of the tissue in order to prepare it for  
474 regeneration. Ctenophore regeneration, however, is strictly associated with epimorphic  
475 regeneration since none of the missing structures can be reformed in the absence of cell

476 proliferation as proved by cell proliferation blocking treatments. Indeed, a combination of  
477 both epimorphosis and morphallaxis strategies has been previously described in the  
478 regeneration of other animals including annelids (De Jong and Seaver, 2016; Özpölat  
479 and Bely, 2016), although in those cases morphallaxis takes place simultaneously with  
480 epimorphosis – or even subsequent to epimorphosis – and is involved in the regeneration  
481 of a specific structures such as parapodia (Berril, 1931) or the gut (Zattara and Bely,  
482 2011).

483 Cell proliferation in *M. leidyi* is first detected at the wound site between 6-12 hours  
484 after surgery. The percentage of proliferating cells increases progressively during the  
485 first 12 hours following injury and reaches a maximum around 24 hours when the  
486 primordia of the missing structures are clearly delineated. Following this peak of cell  
487 proliferation, the percentage of cells undergoing cell division (S-phase) decreases while  
488 cells start to differentiate into their final structures. Comparing the kinetics of cell  
489 proliferation during regeneration of *M. leidyi* with the anthozoan cnidarian *Nematostella*  
490 *vectensis* (Passamanek and Martindale, 2012), the percentage of dividing cells at the  
491 wound site is lower and the peak of maximum cell proliferation occurs earlier in  
492 ctenophore regeneration. In intact cydippids, cell proliferation is concentrated in two main  
493 areas of the cydippid's body corresponding to the tentacle bulbs. Some actively cycling  
494 cells are also found in the apical organ as well as few isolated dividing cells along the  
495 pharynx and under the comb rows. These results are consistent with previous EdU  
496 analysis performed in *M. leidyi* cydippids (Schnitzler et al., 2014; Reitzel et al., 2016) and  
497 adult ctenophores of the species *Pleurobrachia pileus* (Alié et al., 2011) where EdU  
498 labeling has been detected in the same spatially restricted populations identified as stem  
499 cell pools, specialized in the production of particular cell types. Pulse-chase experiments  
500 show migration of proliferating cells from the tentacle bulb through to the distal tips of the  
501 tentacle while a small population of slowly-dividing cells remains in the tentacle bulb.  
502 These observations fit with histological and cellular descriptions of the tentacle apparatus  
503 (Alié et al., 2011; Borisenko and Ereskovsky, 2013) which identified different populations  
504 of undifferentiated progenitors source of all cell types found in the tentacle tissue.

505 Interestingly, proliferating cells during regeneration do not organize to form a  
506 single large blastema-like structure from which a field of cells proliferate and differentiate  
507 to form the missing structures. Rather, small numbers of undifferentiated cells assume  
508 the correct location of all missing structures simultaneously and differentiate in place.  
509 Considering the early branching phylogenetic position of ctenophores in the tree of life  
510 (Dunn et al., 2008; Ryan et al., 2013), the absence of blastema during ctenophore  
511 regeneration questions whether the formation of a blastema – which so far appears to



512 have been reported in representatives of all phyla of regenerating animals (Sánchez  
513 Alvarado, 2000) – is a conserved trait throughout the evolution of regeneration.

514 The strict requirement of cell proliferation and the absence of blastema formation  
515 make ctenophore regeneration a case of non-blastemal epimorphic regeneration.  
516 Although far less common than the blastemal based regeneration, isolated cases of non-  
517 blastemal regeneration have been reported such as lens regeneration by  
518 transdifferentiation in newts (Tsonis and Del Rio-Tsonis, 2004) or liver regeneration by  
519 compensatory proliferation in humans (Michalopoulos and DeFrances, 1997). EdU  
520 pulse-chase experiments after amputation show little to no contribution of cells  
521 originating in the main regions of active cell proliferation, including the tentacle bulbs, to  
522 the formation of missing structures. Moreover, the removal of these structures (tentacle  
523 bulbs), which have been reported to be localized areas of expression of genes involved  
524 in stem cell maintenance and regulation of cell fate (Alié et al., 2011; Schnitzler et al.,  
525 2014; Reitzel et al., 2016) and thus proposed to act as stem cell niches for regeneration,  
526 do not prevent regeneration. These observations argue against the contribution of  
527 discreet stem cell pools that migrate to and give rise to the re-formation of lost structures,  
528 suggesting that new structures are generated from a local source of cells that become  
529 activated to give rise to missing structures/cell types.

530 It is however important to note that our experiments do not answer the question  
531 of the origin of cells that give rise to new structures. One possibility is that wound healing  
532 activates the dedifferentiation of cells at the wound site that are reprogrammed to give  
533 rise to whatever the appropriate set of cell types are needed to reconstitute the missing  
534 structures. The accumulation of large undifferentiated cells at the wound site during HU  
535 treatment is at least consistent with this scenario. In contrast, wound healing could  
536 activate a dormant population of slowly-dividing pluripotent stem cells located uniformly  
537 around the body that could migrate to the wound site and drive the regeneration process  
538 which could have escaped/avoided the short pulse of EdU incorporation and re-entered  
539 the cell cycle as a consequence of injury. Nonetheless, combination of cell-lineage and  
540 specific cell-deletion experiments in *M. leidyi* showed that comb plate regeneration  
541 cannot occur when the entire complement of cell lineage comb plate progenitors are  
542 killed during embryogenesis, suggesting that, at least for comb plate regeneration, a  
543 semi-committed somatic stem cell population is set-aside during embryogenesis for  
544 comb plate replacement (Martindale and Henry, 1996, 1999). These data are premature  
545 and need to be extended to other cell types and later stages of the regenerative process,  
546 however the stereotyped cell lineage seen in ctenophores provides exciting opportunities  
547 to pursue the origins of stem cells in the regenerative process in living animals.

548 Overall, our data, together with evidences from previous studies in ctenophores,  
549 support the strategy of local dedifferentiation and proliferation of progenitor cells as the  
550 main source of new tissue for ctenophore regeneration (**Figure 12**). Gene expression  
551 data during the process of *M. leidyi* regeneration combined with cell tracing experiments  
552 will contribute to refine our model of the origin of cells during ctenophore regeneration.  
553 Molecular data during regeneration will also be very valuable for performing comparisons  
554 of gene expression profiles between *M. leidyi* development (Levin et al., 2016) and  
555 regeneration and thus determine whether the molecular basis of ctenophore  
556 regeneration is similar to that deployed during development.

557 It is quite accepted that cells that re-epithelialize the wound provide the signals  
558 necessary to initiate regeneration (Brockes and Kumar, 2008; Owlarn et al., 2017). In  
559 vertebrates, local thrombin activation is a signal for regeneration as shown by the study  
560 in which cultured newt myotubes returned to the cell cycle by the activity of a thrombin-  
561 generated ligand (Tanaka et al., 1999). On the other hand, cellular interactions also seem  
562 to be important for the initiation of the regenerative response. One such case is the  
563 dorsoventral interaction between the wounded tissues during wound healing in  
564 planarians which has been shown to play a key role in the formation of the blastema and,  
565 hence, initiation of regeneration (Kato et al., 1999). These observations suggest that  
566 wound healing and regeneration are two closely related processes which need to take  
567 place sequentially in time. Our results, however, show that ctenophore regeneration can  
568 be initiated over 48 hours after wound healing is completed, suggesting that regeneration  
569 can be initiated without direct signaling induced by the wounded epithelium.  
570 Regeneration of the missing structures is not initiated until the cell proliferation blocking  
571 treatment is removed. Hence, another case scenario is that the wound epithelium  
572 produces persistent signaling necessary for triggering regeneration at the time of wound  
573 healing, but the process cannot be initiated due to the blocking of cell proliferation. This  
574 is consistent with the proposed hypothesis for *Nematostella* that the key transition from  
575 wound healing to a state of regeneration is the activation of cell proliferation (DuBuc et  
576 al., 2014). Studying and comparing the molecular signaling involved in both ctenophore  
577 wound healing and regeneration will be very useful to get further insight into the  
578 relationship between these two processes.

579 In conclusion, this study provides a rigorous description of the morphological and  
580 cellular events during ctenophore regeneration and compares them with the regenerative  
581 strategies followed by other metazoans. The early branching phylogenetic position of  
582 ctenophores together with their rapid, highly stereotyped development and remarkable  
583 ability to regenerate make them a key system to gain a better understanding of the  
584 evolution of animal regeneration.

## 585 MATERIALS AND METHODS

### 586 Animal care

587 Regeneration experiments were performed on juvenile *Mnemiopsis leidyi* cydippid  
588 stages due to their small size and ease of visualization and because their power of  
589 regeneration is the same as adults (Martindale, 1986). *M. leidyi* cydippids were obtained  
590 from spawning adults collected from either the floating docks located around Flagler  
591 Beach area, FL. USA, or from the floating docks at the east end of the Bridge of Lions  
592 on Anastasia Island, St. Augustine, FL. USA. For spawning, freshly collected adults were  
593 kept in constant light for at least two consecutive nights and then individual animals  
594 transferred into 6" diameter glass culture dishes filled with 1x FSW and placed in total  
595 darkness. After approximately 3-4 hours in the dark at 22-24°C, these self-fertile  
596 hermaphroditic animals had spawned and embryos were collected by pipetting them into  
597 a new dish of UV treated 1.0 micron filtered full strength seawater (1x FSW) using a  
598 transfer pipette. Embryos were raised at 22-24°C for approximately 5-7 days and fed  
599 once a day with rotifers (*Brachionus plicatilis*, 160µm) (Reed Mariculture, Campbell, CA.  
600 USA).

601

### 602 Animal surgeries

603 Operations were done in 35 mm plastic petri dishes with 2 mm thick silicon-coated  
604 bottoms (SYLGARD-184, Dow Corning, Inc.) on cydippids 1.5-3.0 mm in diameter.  
605 Cydippids were transferred in to the operation dishes in 0.2 µm-filtered seawater and cut  
606 using hand pulled glass needles from Pyrex capillaries (Martindale, 1986). Three types  
607 of operations were performed: 1) Oral-aboral bisections, in which animals were cut  
608 longitudinally through the esophageal plane generating two "half-animals". The  
609 operations were performed such that one half retained an intact apical organ while the  
610 remaining half lacked the apical organ. Only the halves retaining the apical organ were  
611 studied here as these halves regenerate to normal animals in a high percentage of the  
612 cases (Martindale, 1986). 2) Apical organ amputations, involving the removal of the  
613 apical organ by cutting perpendicular to the oral-aboral axis above the level of the  
614 tentacle bulbs. 3) Tentacle bulb amputations, consisting in the removal of both tentacle  
615 bulbs (**Figure 1D**). Following surgery, halves containing the apical organ, amputated  
616 cydippids without apical organ and amputated cydippids without tentacle bulbs were  
617 returned to 35 mm plastic Petri dishes filled with 0.2 µm filtered 1x FSW for the desired  
618 length of time without feeding. All the regenerating experiments were performed at 22-  
619 24°C.

620 To study the wound healing process, juvenile cydippids were punctured  
621 generating a round-shaped wound of approximately 200-400 µm of diameter. Animals

622 were placed in a small drop of water over a Rain-X (Inc.) treated microscope slide and  
623 punctures were performed by pinching the epithelium layer using a pair of sharp needles  
624 (World Precision Instruments, Sarasota, FL. USA, Cat#500341). After puncture, animals  
625 were checked for the presence of an epithelial gap with the edges of the wound forming  
626 a small circumference exposing the mesoglea, and then they were immediately mounted  
627 for live imaging (see below).

628

## 629 **Tissue labeling and cell counts**

### 630 *Detection of cell proliferation by incorporation of EdU*

631 To label proliferating cells, cydippids were fixed and processed for fluorescent detection  
632 of incorporated EdU using the Click-iT EdU labeling kit (Invitrogen by Thermo Fisher  
633 Scientific, Waltham, MA. USA, Cat #C10424), which incorporates EdU in cells that are  
634 undergoing the S phase of the cell cycle. Specifically, intact cydippids between 1.5-3.0  
635 mm in diameter or bisected/amputated cydippids were incubated in EdU labeling solution  
636 (100  $\mu$ M of EdU in 1x FSW) for 15 minutes. For pulse-chase experiments cydippids were  
637 incubated with 100  $\mu$ M EdU in 1x FSW for 15 minutes, washed 3 times with 100  $\mu$ M  
638 thymidine in 1x FSW, and maintained in increasing volumes of 1x FSW until fixation.  
639 Control or operated cydippids were embedded in 1.2% low melt agarose (25°C melting  
640 temperature, USB, Inc Cat #32830) in a 35 mm plastic petri dish (Fisher, Inc. Cat  
641 #08757100A) and fixed in ice-cold 100mM HEPES pH 6.9; 0.05M EGTA; 5mM MgSO<sub>4</sub>;  
642 200mM NaCl; 1x PBS; 3.7% Formaldehyde; 0.2% Glutaraldehyde; 0.2% Triton X-100;  
643 and 1x FSW (0.2  $\mu$ m filtered) for 1 hour at room temperature with gentle rocking (Salinas-  
644 Saavedra and Martindale, 2018). Animals were then washed several times in PBS-  
645 0.02% Triton X-100, then one time in PBS-0.2% Triton X-100 for 20 min, and again  
646 several times in PBS-0.02% Triton X-100. The EdU detection reaction was performed  
647 according to manufacturer instructions using the Alexa-567 reaction kit. Following  
648 detection, cydippids were washed three times in PBS-0.02% Triton X-100, and  
649 subsequently all nuclei were counterstained with DAPI (Invitrogen, Carlsbad, CA. USA,  
650 Cat. #D1306) at 1.43  $\mu$ M in 1x PBS for 2 hours. Cydippids were mounted in TDE  
651 mounting media (97% TDE: 970 $\mu$ l 2,2'-thiodiethanol (Sigma-Aldrich, St. Louis, MO.  
652 USA); 30 $\mu$ l PBS) for visualization. To quantify the percentage of EdU labeled cells at the  
653 wound site, Zeiss 710 confocal z-stack projections of operated cydippids were generated  
654 using Fiji software (Image J) and individual cells were digitally counted using Imaris, Inc.  
655 software (Bitplane, Switzerland). Only the area and z-stacks surrounding the wound site  
656 were used for the analysis. EdU+ cells and nuclei were counted separately in 5 to 10  
657 specimens for each time-point. The number of EdU-positive nuclei were divided by the

658 total number of nuclei stained with DAPI generating a ratio corresponding to the % of  
659 EdU+ cells.

660

### 661 *Immunofluorescence*

662 Proliferating cells in M phase were detected using an antibody against phospho Histone  
663 3 (PH3 – phospho S10). Control or operated cydippids were fixed as mentioned above.  
664 Fixed cydippids were washed several times in PBS-0.02% Triton X-100 (PBT 0.02%),  
665 then one time in PBS-0.2% Triton X-100 (PBT 0.2%) for 10 min, and again several times  
666 in PBT 0.02%. They were then blocked in 5% normal goat serum (NGS; diluted in PBT  
667 0.2%) for 1 hour at room temperature with gentle rocking. After blocking, specimens were  
668 incubated in anti-phospho histone H3 antibody (ARG51679, Arigo Biolaboratories,  
669 Taiwan) diluted 1:150 in 5% NGS overnight at 4°C. The day after, specimens were  
670 washed at least five times with PBS-0.2% Triton X-100. Secondary antibody (Alexa Fluor  
671 488 goat anti-rabbit IgG (A-11008, Invitrogen, Carlsbad, CA. USA) was diluted 1:250 in  
672 5% NGS and incubated over night at 4°C with gentle rocking. After incubation,  
673 specimens were washed three times with PBT 0.02% and incubated with DAPI (0.1µg/µl  
674 in 1x PBS; Invitrogen, Carlsbad, CA. USA, Cat. #D1306) for 2 hours to allow nuclear  
675 visualization. Samples were then rinsed in 1x PBS and mounted in TDE mounting media  
676 (97%TDE: 970µl 2,2'-thiodiethanol (Sigma-Aldrich, St. Louis, MO. USA); 30µl PBS) for  
677 visualization.

678

### 679 **Cell proliferation inhibitor treatment with Hydroxyurea (HU)**

680 Cell proliferation was blocked using the ribonucleotide reductase inhibitor hydroxyurea  
681 (HU) (Sigma-Aldrich, St. Louis, MO. USA). Incubations with hydroxyurea were performed  
682 at a concentration of 5 mM in 1x FSW. Operated cydippids were exposed to continuous  
683 incubations of 5mM HU for 48-72 hours. HU solution was exchanged with freshly diluted  
684 inhibitor every 12 hours. For washing experiments, the effect of HU was reversed by  
685 removal and replacement of the drug with 1x FSW.

686

### 687 **Imaging**

688 *In vivo* differential interference contrast (DIC) images were captured using a Zeiss Axio  
689 Imager M2 coupled with an AxioCam (HRc) digital camera. Fluorescent confocal imaging  
690 was performed using a Zeiss LSM 710 confocal microscope (Zeiss, Gottingen, Germany)  
691 using either a 20x/0.8 NA dry objective or a 40x/1.3 NA oil immersion objective.

692 For time-lapse imaging of the wound healing process, punctured cydippids were  
693 mounted in a hydrophobic-treated slide under a cover slip with clay corners. A hydrogel  
694 concentration of 7.5% in seawater (O'Bryan et al., 2019) was placed around the animals

695 as a mounting media in order to immobilize them during live-imaging. DIC images were  
696 captured using a Zeiss Axio Imager M2 coupled with a Rolera EM-C2 camera (Surrey,  
697 BC. Canada). Stacks were taken every minute. Generation of Z-stack projections, time-  
698 lapse movies and image processing was performed using Fiji software (Schindelin et al.,  
699 2012).

700

## 701 **ACKNOWLEDGEMENTS**

702 We thank Thomas Angelini for providing the hydrogels used for immobilizing cydippids  
703 during live imaging and all the members of our lab for assistance and discussions.

704

## 705 **COMPETING INTERESTS**

706 The authors declare that no competing interests exist.

707

## 708 **REFERENCES**

- 709 Adams, R.L.P., Lindsay, J., 1967. Hydroxyurea. Reversal of inhibition and use as a  
710 cell-synchronizing agent. *J. Biol. Chem.* 242, 1314–1317.
- 711 Alié, A., Leclère, L., Jager, M., Dayraud, C., Chang, P., Le Guyader, H., Quéinnec, E.,  
712 Manuel, M., 2011. Somatic stem cells express Piwi and Vasa genes in an adult  
713 ctenophore: Ancient association of “germline genes” with stemness. *Dev. Biol.*  
714 350, 183–197. <https://doi.org/10.1016/j.ydbio.2010.10.019>
- 715 Alvarado, A.S., Tsonis, P.A., 2006. Bridging the regeneration gap: Genetic insights  
716 from diverse animal models. *Nat. Rev. Genet.* 7, 873–884.  
717 <https://doi.org/10.1038/nrg1923>
- 718 Amiel, A.R., Johnston, H.T., Nedoncelle, K., Warner, J.F., Ferreira, S., Röttinger, E.,  
719 2015. Characterization of morphological and cellular events underlying oral  
720 regeneration in the sea anemone, *Nematostella vectensis*. *Int. J. Mol. Sci.* 16,  
721 28449–28471. <https://doi.org/10.3390/ijms161226100>
- 722 Bading, K.T., Kaehlert, S., Chi, X., Jaspers, C., Martindale, M.Q., Javidpour, J., 2017.  
723 Food availability drives plastic self-repair response in a basal metazoan-case  
724 study on the ctenophore *Mnemiopsis leidyi* A. Agassiz. *Sci. Rep.* 7, 1–9.  
725 <https://doi.org/10.1038/s41598-017-16346-w>
- 726 Baguna, J., Salo, E., Auladell, C., 1989. Regeneration and pattern formation in  
727 planarians. III. that neoblasts are Regeneration and pattern formation in  
728 planarians. III. that neoblasts are totipotent stem cells and the cells totipotent stem  
729 cells and the cells. *Development* 107, 77–86.
- 730 Begnaud, S., Chen, T., Delacour, D., Mège, R.M., Ladoux, B., 2016. Mechanics of  
731 epithelial tissues during gap closure. *Curr. Opin. Cell Biol.* 42, 52–62.



- 732 <https://doi.org/10.1016/j.ceb.2016.04.006>
- 733 Bely, A.E., Nyberg, K.G., 2010. Evolution of animal regeneration: re-emergence of a  
734 field. *Trends Ecol. Evol.* 25, 161–170. <https://doi.org/10.1016/j.tree.2009.08.005>
- 735 Bely, A.E., 2014. Early events in annelid regeneration: a cellular perspective. *Integr.*  
736 *Comp. Biol.* 54, 688–699. <https://doi.org/10.1093/icb/icu109>
- 737 Berrill NJ, 1931. Regeneration in *Sabella pavonina* (Sav.) and other sabellid worms. *J*  
738 *Exp Zool.* 58:495-523.
- 739 Borisenko, I., Ereskovsky, A. V., 2013. Tentacular apparatus ultrastructure in the larva  
740 of *Bolinopsis infundibulum* (Lobata: Ctenophora). *Acta Zool.*  
741 <https://doi.org/10.1111/j.1463-6395.2011.00542.x>
- 742 Bradshaw, B., Thompson, K., Frank, U., 2015. Distinct mechanisms underlie oral vs  
743 aboral regeneration in the cnidarian *hydractinia echinata*. *Elife* 2015, 1–19.  
744 <https://doi.org/10.7554/eLife.05506>
- 745 Brockes, J.P., Kumar, A., 2008. Comparative Aspects of Animal Regeneration. *Annu.*  
746 *Rev. Cell Dev. Biol.* 24, 525–549.  
747 <https://doi.org/10.1146/annurev.cellbio.24.110707.175336>
- 748 Chehrehasa, F., Meedeniya, A.C.B., Dwyer, P., Abrahamsen, G., Mackay-Sim, A.,  
749 2009. EdU, a new thymidine analogue for labelling proliferating cells in the  
750 nervous system. *J. Neurosci. Methods* 177, 122–130.  
751 <https://doi.org/10.1016/j.jneumeth.2008.10.006>
- 752 Chera, S., Ghila, L., Dobretz, K., Wenger, Y., Bauer, C., Buzgariu, W., Martinou, J.C.,  
753 Galliot, B., 2009. Apoptotic Cells Provide an Unexpected Source of Wnt3  
754 Signaling to Drive Hydra Head Regeneration. *Dev. Cell* 17, 279–289.  
755 <https://doi.org/10.1016/j.devcel.2009.07.014>
- 756 Coonfield, B.R., 1936. Regeneration in *Mnemiopsis Leidyi* Agassiz. *Biol. Bull.* 71, 421–  
757 428.
- 758 Cummings, S.G., Bode, H.R., 1984. Head regeneration and polarity reversal in *Hydra*  
759 *attenuata* can occur in the absence of DNA synthesis. *Wilhelm Roux's Arch. Dev.*  
760 *Biol.* 194, 79–86. <https://doi.org/10.1007/BF00848347>
- 761 De Jong, D.M., Seaver, E.C., 2016. A Stable Thoracic Hox Code and Epimorphosis  
762 Characterize Posterior Regeneration in *Capitella teleta*. *PLoS One* 11.  
763 <https://doi.org/10.1371/journal.pone.0149724>
- 764 De Jong, D.M., Seaver, E.C., 2017. Investigation into the cellular origins of posterior  
765 regeneration in the annelid *Capitella teleta*. *Regeneration* 1–17.  
766 <https://doi.org/10.1002/reg2.94>
- 767 Dübel, S., Schaller, H.C., 1990. Terminal Differentiation of Ectodermal Epithelial Stem  
768 Cells of *Hydra* Can Occur in G2 without Requiring Mitosis or S Phase. *J. Cell Biol.*



- 769 110, 939–945. <https://doi.org/10.1083/jcb.110.4.939>
- 770 DuBuc, T.Q., Traylor-Knowles, N., Martindale, M.Q., 2014. Initiating a regenerative  
771 response; cellular and molecular features of wound healing in the cnidarian  
772 *Nematostella vectensis*. *BMC Biol.* 12, 1–20. [https://doi.org/10.1186/1741-7007-](https://doi.org/10.1186/1741-7007-12-24)  
773 12-24
- 774 Dunn, C.W., Hejnal, A., Matus, D.Q., Pang, K., Browne, W.E., Smith, S.A., Seaver, E.,  
775 Rouse, G.W., Obst, M., Edgecombe, G.D., Sørensen, M. V., Haddock, S.H.D.,  
776 Schmidt-Rhaesa, A., Okusu, A., Kristensen, R.M., Wheeler, W.C., Martindale,  
777 M.Q., Giribet, G., 2008. Broad phylogenomic sampling improves resolution of the  
778 animal tree of life. *Nature* 452, 745–749. <https://doi.org/10.1038/nature06614>
- 779 Fischer, A.H.L., Pang, K., Henry, J.Q., Martindale, M.Q., 2014. A cleavage clock  
780 regulates features of lineage-specific differentiation in the development of a basal  
781 branching metazoan, the ctenophore *Mnemiopsis leidyi*. *Evodevo* 5.  
782 <https://doi.org/10.1186/2041-9139-5-4>
- 783 Freeman, G., 1967. Studies on regeneration in the creeping ctenophore, *Vallicula*  
784 *multiformis*. *J. Morphol.* <https://doi.org/10.1002/jmor.1051230107>
- 785 Henry, J.Q., Martindale, M.Q., 2000. Regulation and regeneration in the ctenophore  
786 *Mnemiopsis leidyi*. *Dev. Biol.* 227, 720–733.  
787 <https://doi.org/10.1006/dbio.2000.9903>
- 788 Holstein, T.W., Hobmayer, E., David, C.N., 1991. Pattern of epithelial cell cycling in  
789 hydra. *Dev. Biol.* 148, 602–611. [https://doi.org/10.1016/0012-1606\(91\)90277-A](https://doi.org/10.1016/0012-1606(91)90277-A)
- 790 Jager, M., Manuel, M., 2016. Ctenophores: an evolutionary-developmental perspective.  
791 *Curr. Opin. Genet. Dev.* 39, 85–92. <https://doi.org/10.1016/j.gde.2016.05.020>
- 792 Jopling, C., Sleep, E., Raya, M., Martí, M., Raya, A., Belmonte, J.C.I., 2010. Zebrafish  
793 heart regeneration occurs by cardiomyocyte dedifferentiation and proliferation.  
794 *Nature* 464, 606–609. <https://doi.org/10.1038/nature08899>
- 795 Kamran, Z., Zellner, K., Kyriazis, H., Kraus, C.M., Reynier, J.B., Malamy, J.E., 2017. In  
796 vivo imaging of epithelial wound healing in the cnidarian *Clytia hemisphaerica*  
797 demonstrates early evolution of purse string and cell crawling closure  
798 mechanisms. *BMC Dev. Biol.* 17, 1–14. [https://doi.org/10.1186/s12861-017-0160-](https://doi.org/10.1186/s12861-017-0160-2)  
799 2
- 800 Kato, K., Orii, H., Watanabe, K., Agata, K., 1999. The role of dorsoventral interaction in  
801 the onset of planarian regeneration. *Development* 126, 1031–1040.  
802 <https://doi.org/10.1242/dev.031682>
- 803 Knopf, F., Hammond, C., Chekuru, A., Kurth, T., Hans, S., Weber, C.W., Mahatma, G.,  
804 Fisher, S., Brand, M., Schulte-Merker, S., Weidinger, G., 2011. Bone regenerates  
805 via dedifferentiation of osteoblasts in the zebrafish fin. *Dev. Cell* 20, 713–724.

- 806 <https://doi.org/10.1016/j.devcel.2011.04.014>
- 807 Kragl, M., Knapp, D., Nacu, E., Khattak, S., Maden, M., Epperlein, H.H., Tanaka, E.M.,  
808 2009. Cells keep a memory of their tissue origin during axolotl limb regeneration.  
809 Nature 460, 60–65. <https://doi.org/10.1038/nature08152>
- 810 Levin, M., Anavy, L., Cole, A.G., Winter, E., Mostov, N., Khair, S., Senderovich, N.,  
811 Kovalev, E., Silver, D.H., Feder, M., Fernandez-Valverde, S.L., Nakanishi, N.,  
812 Simmons, D., Simakov, O., Larsson, T., Liu, S.-Y., Jerafi-Vider, A., Yaniv, K.,  
813 Ryan, J.F., Martindale, M.Q., Rink, J.C., Arendt, D., Degnan, S.M., Degnan, B.M.,  
814 Hashimshony, T., Yanai, I., 2016. The mid-developmental transition and the  
815 evolution of animal body plans. Nature 531, 637.
- 816 Martindale, M.Q., 1986. The ontogeny and maintenance of adult symmetry properties  
817 in the ctenophore, *Mnemiopsis mccradyi*. Dev. Biol. [https://doi.org/10.1016/0012-](https://doi.org/10.1016/0012-1606(86)90026-6)  
818 [1606\(86\)90026-6](https://doi.org/10.1016/0012-1606(86)90026-6)
- 819 Martindale, M.Q., 2016. The onset of regenerative properties in ctenophores. Curr.  
820 Opin. Genet. Dev. <https://doi.org/10.1016/j.gde.2016.06.017>
- 821 Martindale, M.Q., Henry, J.Q., 1996. Development and Regeneration of Comb Plates  
822 in the Ctenophore *Mnemiopsis leidyi*. Biol. Bull. 191, 290–292.  
823 <https://doi.org/10.1086/BBLv191n2p290>
- 824 Martindale, M.Q., Henry, J.Q., 1999. Intracellular Fate Mapping in a Basal Metazoan,  
825 the Ctenophore *Mnemiopsis leidyi*, Reveals the Origins of Mesoderm and the  
826 Existence of Indeterminate Cell Lineages. Dev. Biol. 214, 243–257.
- 827 Michalopoulos, G.K., DeFrances, M., 1997. Liver regeneration. Science (80-. ). 276,  
828 60–66. <https://doi.org/10.1007/b99968>
- 829 Morgan, T.H., 1901. Regeneration. New York: The Macmillan Company.
- 830 Newmark, P.A., Sánchez Alvarado, A., 2000. Bromodeoxyuridine specifically labels the  
831 regenerative stem cells of planarians. Dev. Biol. 220, 142–153.  
832 <https://doi.org/10.1006/dbio.2000.9645>
- 833 O'Bryan, C.S., Kabb, C.P., Sumerlin, B.S., Angelini, T.E., 2019. Jammed  
834 Polyelectrolyte Microgels for 3D Cell Culture Applications: Rheological Behavior  
835 with Added Salts. ACS Appl. Bio Mater. <https://doi.org/10.1021/acsabm.8b00784>
- 836 Owlarn, S., Klenner, F., Schmidt, D., Rabert, F., Tomasso, A., Reuter, H., Mulaw, M.A.,  
837 Moritz, S., Gentile, L., Weidinger, G., Bartscherer, K., 2017. Generic wound  
838 signals initiate regeneration in missing-tissue contexts. Nat. Commun. 8, 1–13.  
839 <https://doi.org/10.1038/s41467-017-02338-x>
- 840 Özpolat, B.D., Bely, A.E., 2016. Developmental and molecular biology of annelid  
841 regeneration: a comparative review of recent studies. Curr. Opin. Genet. Dev. 40,  
842 144–153. <https://doi.org/10.1016/j.gde.2016.07.010>

- 843 Pang, K., Martindale, M.Q., 2008. Comb jellies (Ctenophora): A model for basal  
844 metazoan evolution and development. *Cold Spring Harb. Protoc.* 3, 1–11.  
845 <https://doi.org/10.1101/pdb.emo106>
- 846 Park, H.D., Ortmeyer, A.B., Blankenbaker, D.P., 1970. Cell Division during  
847 Regeneration in Hydra. *Nature* 228, 227–231.
- 848 Passamaneck, Y.J., Martindale, M.Q., 2012. Cell proliferation is necessary for the  
849 regeneration of oral structures in the anthozoan cnidarian *Nematostella vectensis*.  
850 *BMC Dev. Biol.* 12. <https://doi.org/10.1186/1471-213X-12-34>
- 851 Planques, A., Malem, J., Parapar, J., Vervoort, M., Gazave, E., 2019. Morphological,  
852 cellular and molecular characterization of posterior regeneration in the marine  
853 annelid *Platynereis dumerilii*. *Dev. Biol.* 445, 189–210.  
854 <https://doi.org/10.1016/j.ydbio.2018.11.004>
- 855 Reitzel, A.M., Pang, K., Martindale, M.Q., 2016. Developmental expression of  
856 “germline”- and “sex determination”-related genes in the ctenophore *Mnemiopsis*  
857 *leidyi*. *Evodevo* 7, 1–16. <https://doi.org/10.1186/s13227-016-0051-9>
- 858 Ryan, J.F., Pang, K., Schnitzler, C.E., Nguyen, A.D., Moreland, R.T., Simmons, D.K.,  
859 Koch, B.J., Francis, W.R., Havlak, P., Smith, S.A., Putnam, N.H., Haddock,  
860 S.H.D., Dunn, C.W., Wolfsberg, T.G., C.Mullikin, J., Martindale, M.Q., Baxevanis,  
861 A.D., 2013. The genome of the ctenophore *Mnemiopsis leidyi* and its implications  
862 for cell type evolution. *Science* (80-. ). 342.  
863 <https://doi.org/10.1126/science.1242592>
- 864 Salic, A., Mitchison, T.J., 2008. A chemical method for fast and sensitive detection of  
865 DNA synthesis in vivo. *PNAS* 105. <https://doi.org/10.1073/pnas.0712168105>
- 866 Salinas-Saavedra, M., Martindale, M.Q., 2018. Improved protocol for spawning and  
867 immunostaining embryos and juvenile stages of the ctenophore *Mnemiopsis*  
868 *leidyi*.
- 869 Sánchez Alvarado, A., 2000. Regeneration in the metazoans: why does it happen?  
870 *BioEssays* 22, 578–590.
- 871 Sandoval-Guzmán, T., Wang, H., Khattak, S., Schuez, M., Roensch, K., Nacu, E.,  
872 Tazaki, A., Joven, A., Tanaka, E.M., Simon, A., 2014. Fundamental differences in  
873 dedifferentiation and stem cell recruitment during skeletal muscle regeneration in  
874 two salamander species. *Cell Stem Cell* 14, 174–187.  
875 <https://doi.org/10.1016/j.stem.2013.11.007>
- 876 Schindelin, J., Arganda-Carreras, I., Frise, E., Kaynig, V., Longair, M., Pietzsch, T.,  
877 Preibisch, S., Rueden, C., Saalfeld, S., Schmid, B., Tinevez, J.-Y., White, D.J.,  
878 Hartenstein, V., Eliceiri, K., Tomancak, P., Cardona, A., 2012. Fiji: an open-source  
879 platform for biological-image analysis. *Nat. Methods* 9, 676–82.

- 880 <https://doi.org/10.1038/nmeth.2019>
- 881 Schnitzler, C.E., Simmons, D.K., Pang, K., Martindale, M.Q., Baxevanis, A.D., 2014.  
882 Expression of multiple Sox genes through embryonic development in the  
883 ctenophore *Mnemiopsis leidyi* is spatially restricted to zones of cell proliferation.  
884 *Evodevo* 5, 1–17. <https://doi.org/10.1186/2041-9139-5-15>
- 885 Singer, I.I., 1971. Tentacular and oral-disc regeneration in the sea anemone, *Aiptasia*  
886 *diaphana*. *J. Embryol. Exp. Morphol.* 26, 253–270.  
887 <https://doi.org/10.1007/BF00597293>
- 888 Tamm, S.L., 2012. Regeneration of Ciliary Comb Plates in the Ctenophore *Mnemiopsis*  
889 *leidyi*. I. Morphology. *J. Morphol.* 109–120. <https://doi.org/10.1002/jmor.11016>
- 890 Tanaka, E.M., Drechsel, D.N., Brockes, J.P., 1999. Thrombin regulates S-phase re-  
891 entry by cultured newt myotubes. *Curr. Biol.* 9, 792–799.  
892 [https://doi.org/10.1016/S0960-9822\(99\)80362-5](https://doi.org/10.1016/S0960-9822(99)80362-5)
- 893 Tanaka, E.M., Reddien, P.W., 2011. The Cellular Basis for Animal Regeneration. *Dev.*  
894 *Cell* 21, 172–185. <https://doi.org/10.1016/j.devcel.2011.06.016>
- 895 Tsonis, P.A., Del Rio-Tsonis, K., 2004. Lens and retina regeneration:  
896 Transdifferentiation, stem cells and clinical applications. *Exp. Eye Res.* 78, 161–  
897 172. <https://doi.org/10.1016/j.exer.2003.10.022>
- 898 Wagner, D.E., Wang, I.E., Reddien, P.W., 2011. Clonogenic neoblasts are pluripotent  
899 adult stem cells that underlie planarian regeneration. *Science* (80-. ). 332, 811–  
900 816. <https://doi.org/10.1126/science.1203983>.
- 901 Young CW, Hodaas S, 1964. Hydroxyurea: inhibitory effect on DNA metabolism.  
902 *Science.* 146:1172–1174.
- 903 Zattara, E.E., Bely, A.E., 2011. Evolution of a novel developmental trajectory: Fission is  
904 distinct from regeneration in the annelid *Pristina leidyi*. *Evol. Dev.* 13, 80–95.  
905 <https://doi.org/10.1111/j.1525-142X.2010.00458.x>
- 906 Zattara, E.E., Turlington, K.W., Bely, A.E., 2016. Long-term time-lapse live imaging  
907 reveals extensive cell migration during annelid regeneration. *BMC Dev. Biol.* 16,  
908 1–21. <https://doi.org/10.1186/s12861-016-0104-2>
- 909

## FIGURES AND LEGENDS

Figure 1

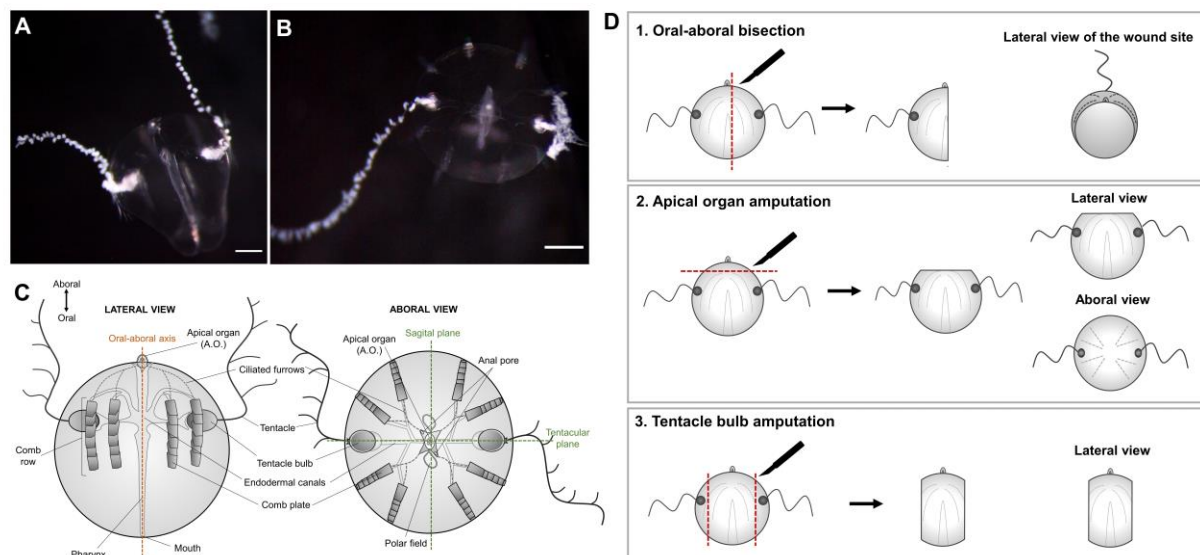

**Figure 1. Cydippid stage of *Mnemiopsis leidyi* and animal surgeries.** (A) Lateral view of a *M. leidyi* cydippid. (B) Aboral view of a *M. leidyi* cydippid. Scale bars = 100 $\mu$ m. (C) Schematic representation of the body plan of a cydippid stage in a lateral and aboral views. (D) Diagrams showing the three types of animal surgeries performed in this study and the views presented for each one.

Figure 2

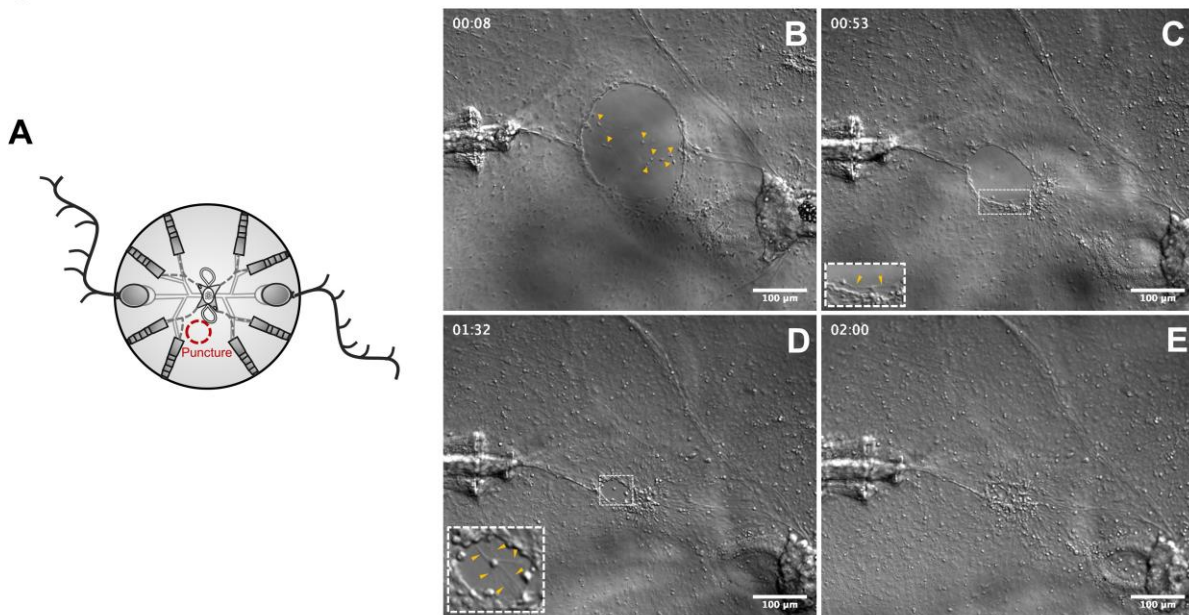

**Figure 2. Wound healing by filopodia-dependent cell crawling.** (A) Schematic representation of the puncture assay. (B-E) DIC images of the main phases of wound closure (See Supplementary file 2 for the time lapse video corresponding to these images). (B) Cells from the mesoglea (yellow arrow caps) migrate upwards and adhere to the edges of the wound. (C) Marginal cells of the wound gap extend filopodia to the adjacent cells pulling the edges of the wound together. The inset shows a closer look to the cells at the edge of the wound and yellow arrow caps point to the filopodia. (D) When the diameter of the gap is considerably reduced, cells of the wound edge extend filopodia towards the opposite edges of the gap. The inset shows a cell extending multiple filopodia. (E) Network of filopodia connecting all the edges of the wound. Scale bars = 100µm.



Figure 3

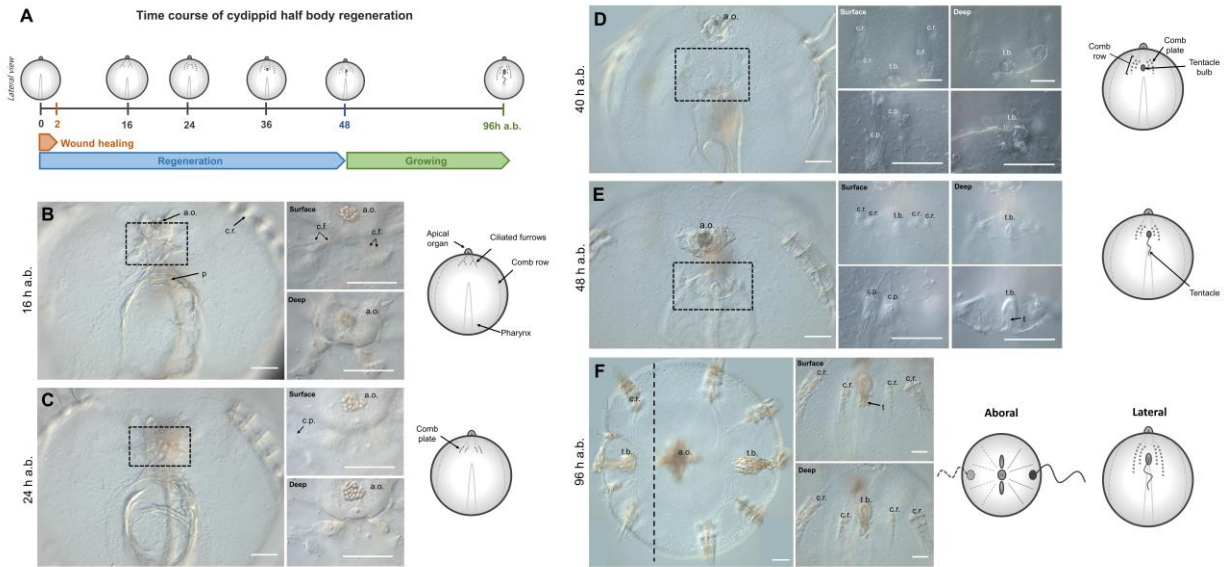

**Figure 3. Half body regeneration in *Mnemiopsis leidyi* cydippid.** (A) Schematic representation of the time course of morphogenic events during cydippid half body regeneration. All cartoons correspond to lateral views of the cydippid's body bisected through the oral-aboral axis showing the cut site in the first plane. The apical organ is located at the aboral end (top) and the mouth at the oral end (down). For simplicity, tissues on the opposite body site are not depicted. (B-F) DIC images showing the cut site of regenerating cydippids from 16 to 96 h a.b. Dotted line rectangles in (B), (C), (D) and (E) show the area corresponding to higher magnifications on the right. Magnifications show surface and deep planes. The vertical dotted line in (F) indicates the approximate position of bisection, and all tissue in the left of the line is regenerated tissue. Scale bars = 100  $\mu$ m. Abbreviations: hours after bisection (h a.b.), apical organ (a.o.), pharynx (p), comb row (c.r.), ciliated furrow (c.f.), comb plate (c.p.), tentacle bulb (t.b.), tentacle (t).





Figure 5

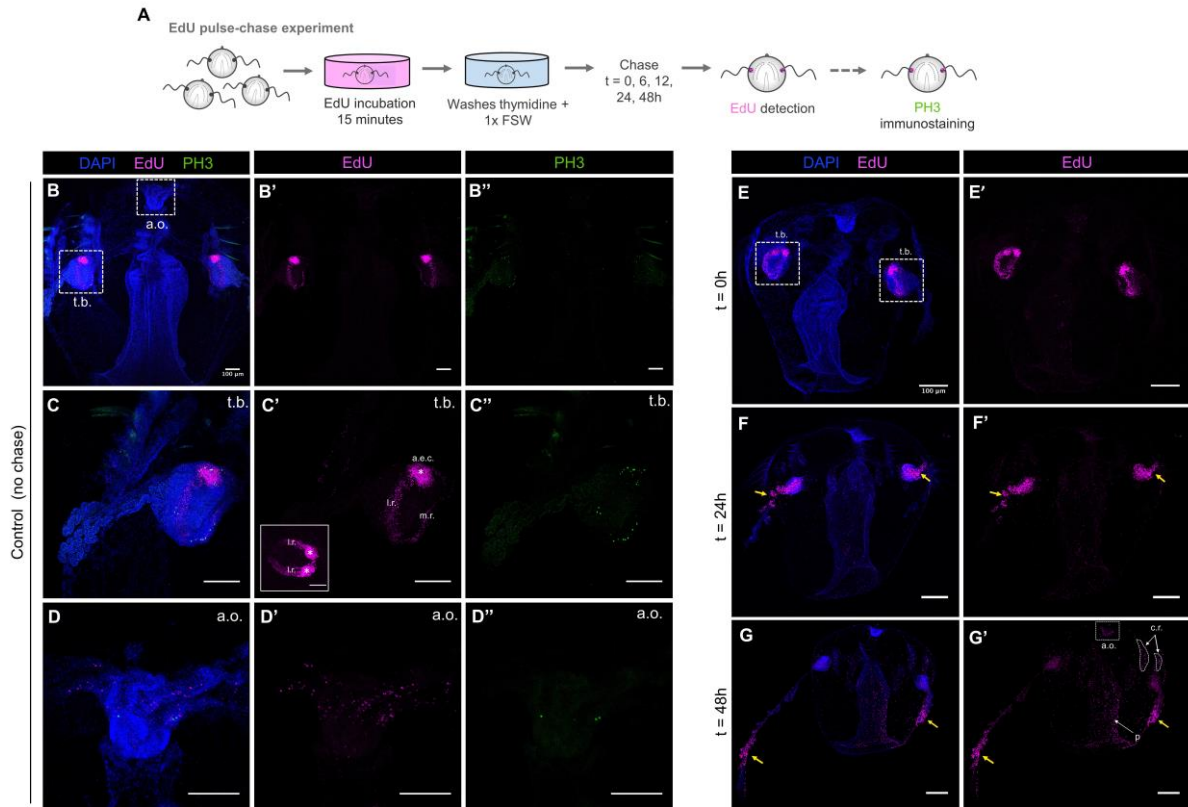

**Figure 5. Cell proliferation in intact cydippids.** (A) Schematic of the EdU pulse-chase experiment and PH3 immunostaining in intact cydippids. (B-D') Confocal stack projections of whole intact cydippids oriented in a lateral view. White dotted rectangles in (B) delimit the tentacle bulb (t.b.) (C-C'') and apical organ (a.o.) (D-D'') structures showed in higher magnification at the bottom. Nuclei of S-phase cells are labeled with EdU (magenta), M-phase cells are immunostained with anti-phospho-Histone 3 (PH3) (green) and all nuclei are counterstained with DAPI (blue). Note that both markers of cell proliferation (EdU and PH3) show the same pattern of distribution along the cydippid's body. The inset in (C') shows an aboral view of the tentacle bulb after EdU staining. White asterisks in (C') point to the symmetrical populations of intense cell proliferation referred as aboral/external cell masses (a.e.c.). (E-G') Confocal stack projections of whole intact cydippids oriented in a lateral view. The time of the chase is listed at the top of the columns, and the labeling corresponding to each panel is listed to the left of the rows. Nuclei of S-phase cells are labeled with EdU (magenta) and all nuclei are counterstained with DAPI (blue). Note that EdU+ cells migrate from the tentacle bulb to the most distal end of the tentacle (yellow arrows). See **Supplementary Figure 2** for further detail of EdU pulse-chase experiment in the tentacle bulb. Scale bars = 100  $\mu$ m. Abbreviations: apical organ (a.o.), tentacle bulb (t.b.), aboral/external cell masses (a.e.c.), lateral ridge (l.r.), medial ridge (m.r.), comb row (c.r.).

Figure 6

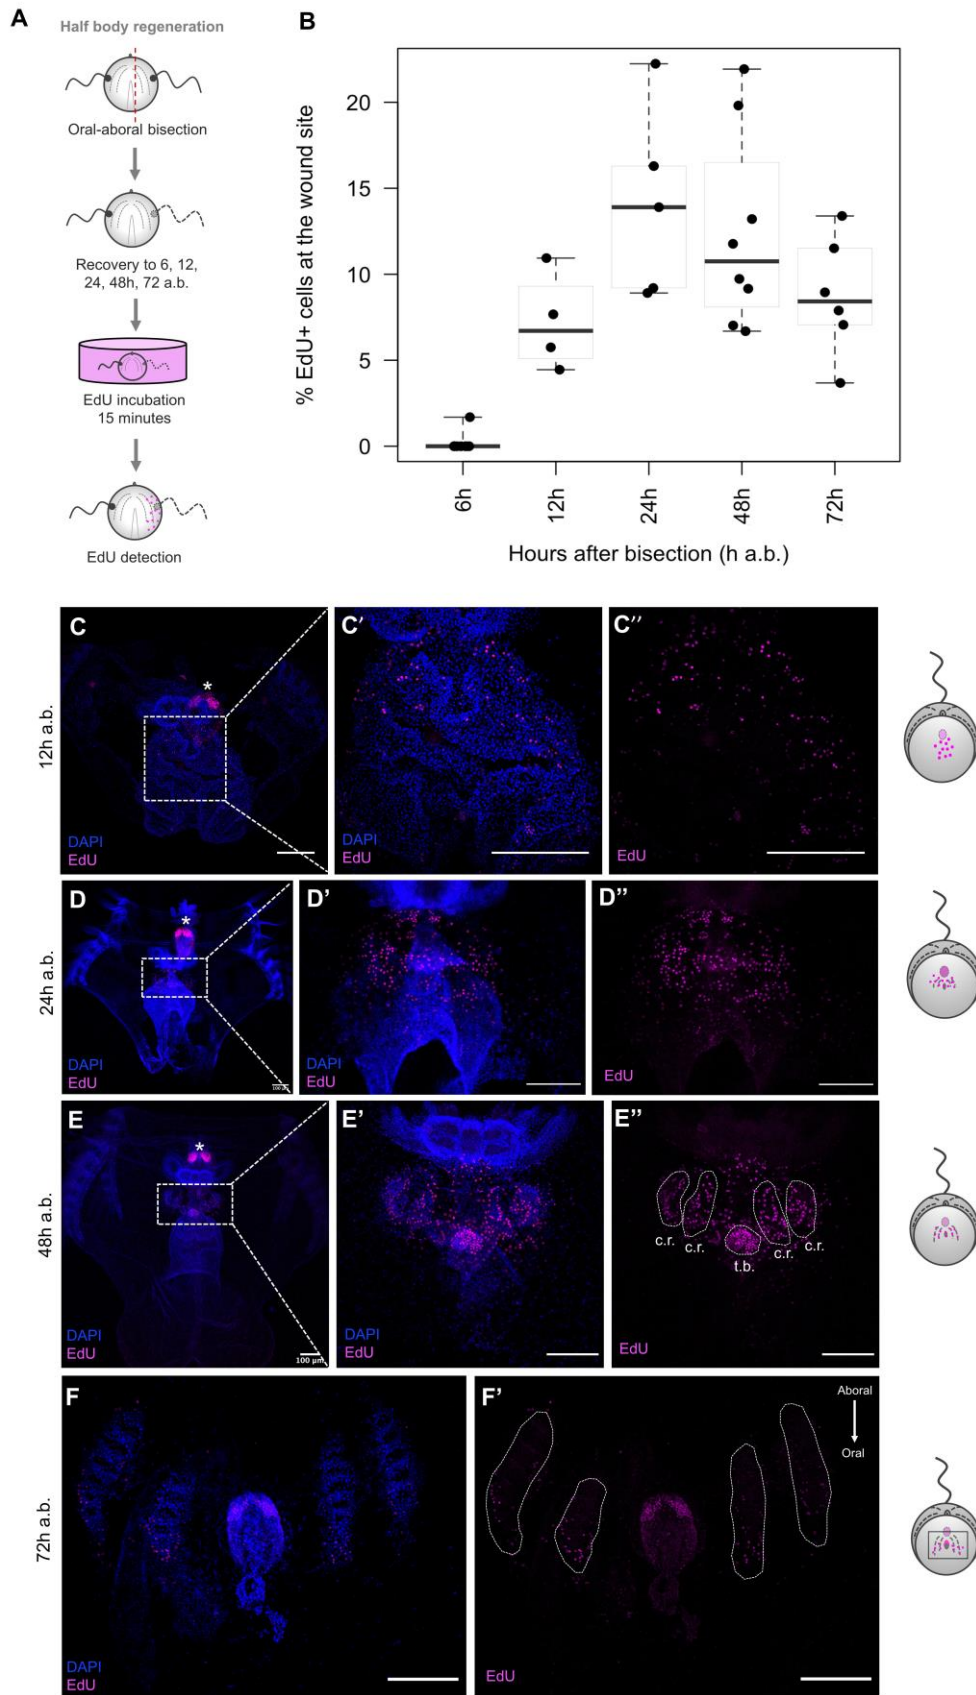

**Figure 6. Cell proliferation during half body regeneration.** (A) Schematic of the EdU incorporation experiment in cydippids bisected through the oral-aboral axis. (B) Box plot showing the levels of cell proliferation at the wound site at different time points after bisection. The thick horizontal bars indicate the median values. Each dot represents one individual. (C-F') Confocal stack projections of bisected cydippids through the oral-aboral axis oriented in a lateral view showing the cut site in the first plane. The time following bisection is listed to the left of the rows. Nuclei of S-phase cells are labeled with EdU (magenta) and all nuclei are counterstained with DAPI (blue). The pattern of EdU labeling corresponding to each time-point is shown in a cartoon on the right of the rows. Dotted line rectangles in (C), (D) and (E) show the area corresponding to higher magnifications on the right. White dotted lines in (E'') and (F') delimit the area corresponding to the regenerating comb rows and tentacle bulb. White asterisks point to tentacle bulbs of the uncut site. Note that EdU+ cells at 72 hpa (F') are located at the oral end of the regenerating comb rows and no EdU+ cells are detected at the aboral end where cells are already differentiated. Scale bars = 100  $\mu$ m. Abbreviations: hours after bisection (h a.b.), comb row (c.r.), tentacle bulb (t.b.).



Figure 7

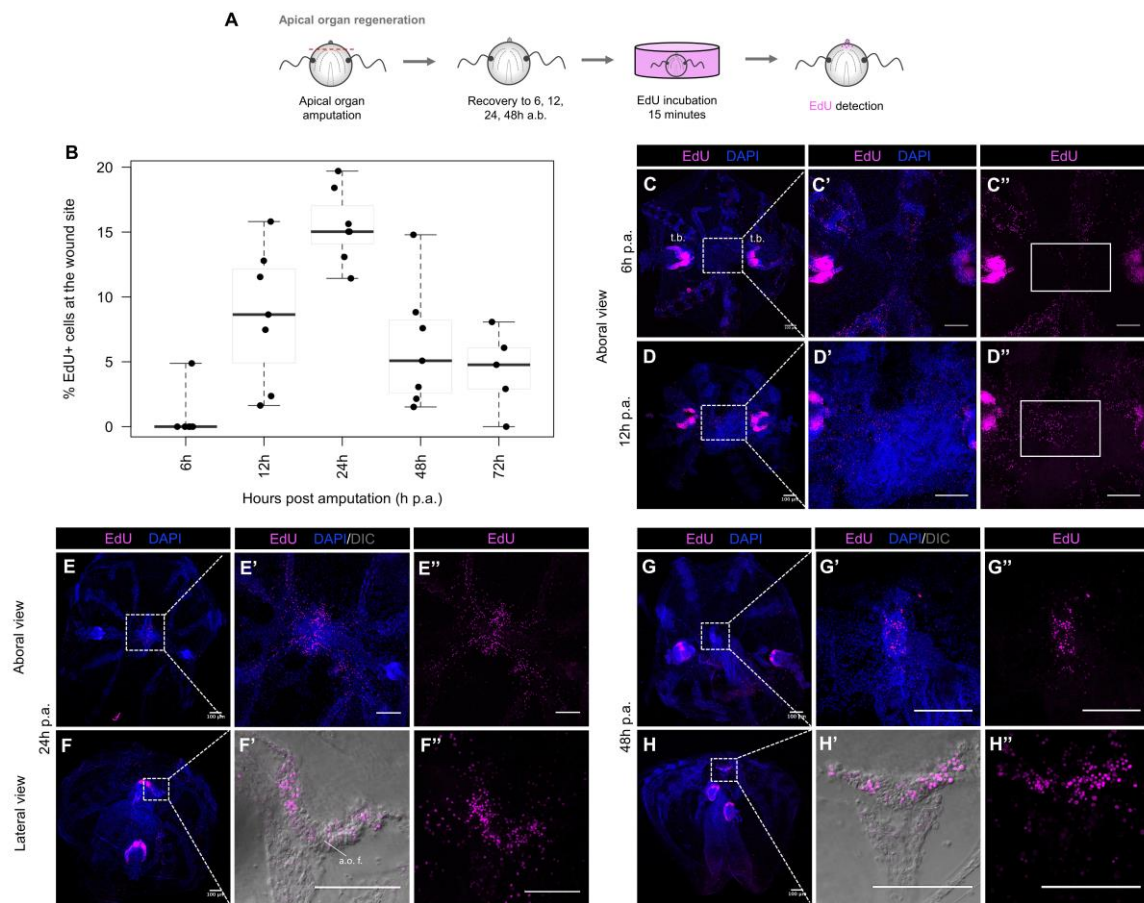

**Figure 7. Cell proliferation during apical organ regeneration.** (A) Schematic of the EdU incorporation experiment in cydippids in which the apical organ was amputated. (B) Box plot showing the levels of cell proliferation at the wound site at different time points post amputation. The thick horizontal bars indicate the median values. Each dot represents one individual. (C-H'') Confocal stack projections of cydippids in which the apical organ was amputated at different time points post amputation. Aboral and lateral views are shown. The labeling corresponding to each panel is listed at the top of the columns, and the time following amputation is listed to the left of the rows. Dotted line rectangles in (C), (D), (E), (F), (G) and (H) show the area corresponding to higher magnifications on the right. White rectangles in (C'') and (D'') delimit the area of apical organ regeneration. Nuclei of S-phase cells are labeled with EdU (magenta) and all nuclei are counterstained with DAPI (blue). DIC images of the tissue are shown in (F') and (H'). Scale bars = 100  $\mu$ m. Abbreviations: tentacle bulb (t.b.), apical organ floor (a.o. f), hours post amputation (h p.a.).

Figure 8

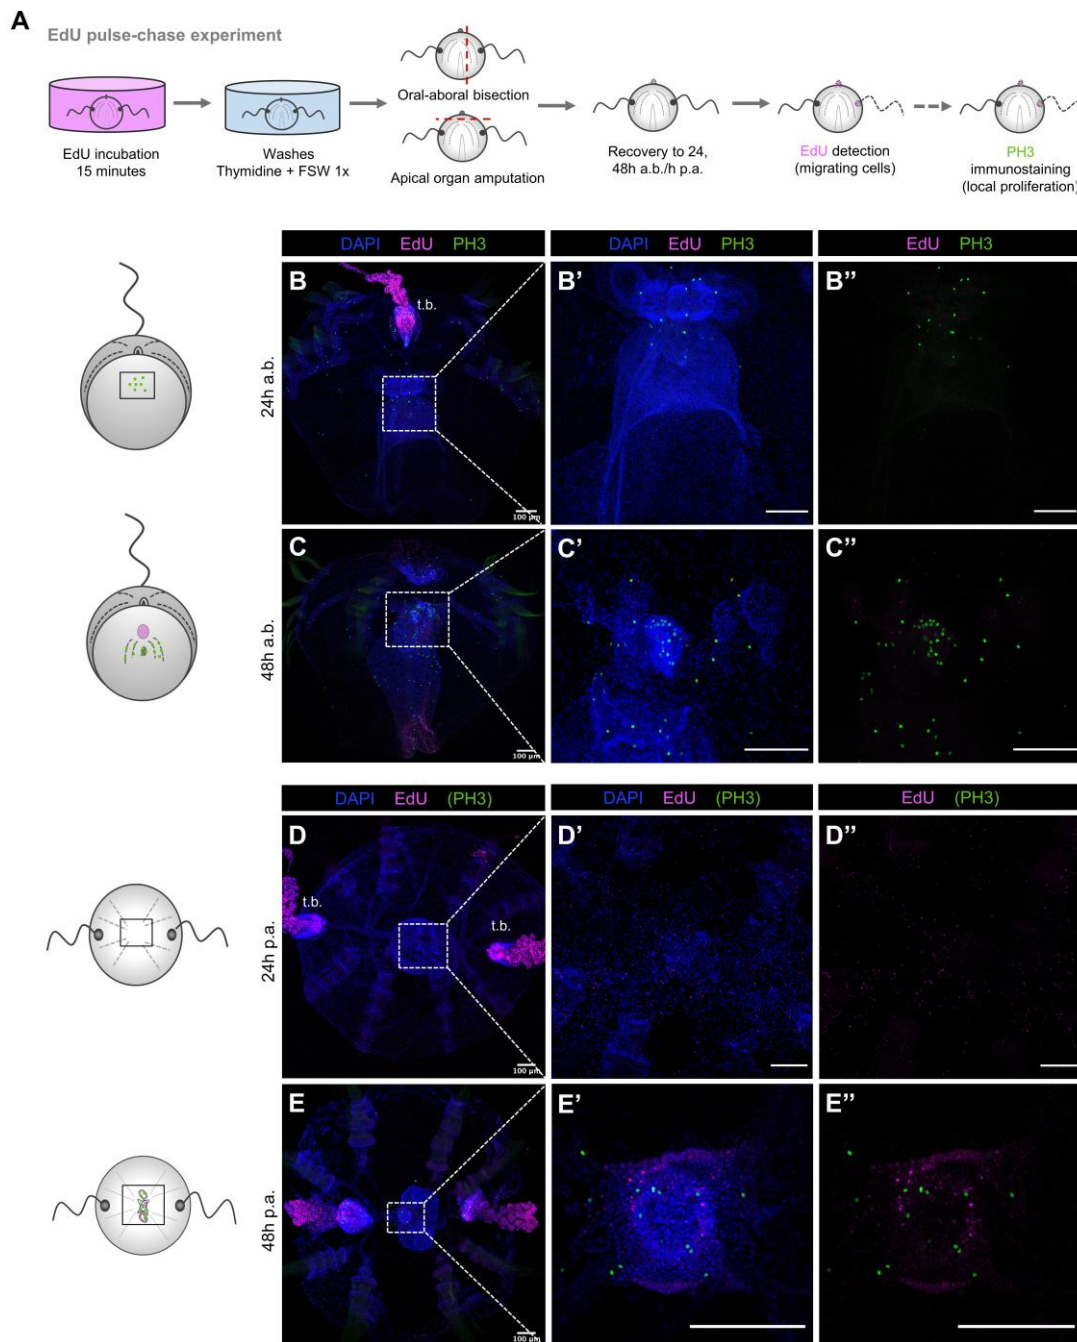

**Figure 8. S-phase cells derived from the main regions of cell proliferation do not contribute to the formation of new structures.** (A) Schematic of the EdU pulse-chase experiments and PH3 immunostaining in regenerating cydippids after oral-aboral bisection and apical organ amputation. (B-C'') Confocal stack projections of bisected cydippids through the oral-aboral axis oriented in a lateral view showing the cut site in the first plane. (D-E'') Confocal stack projections of cydippids in which the apical organ was amputated oriented in an aboral view. The labeling corresponding to each panel is listed at the top of the columns, and the time of chase is listed to the left of the rows. Nuclei of S-phase cells are labeled with EdU (magenta), M-phase cells are stained with anti-PH3 (green) and all nuclei are counterstained with DAPI (blue). Dotted line rectangles in (B), (C), (D) and (E) show the area corresponding to higher magnifications on the right. The pattern of EdU and PH3 staining is shown in cartoons on the left. Scale bars = 100 μm. Abbreviations: tentacle bulb (t.b.), hours after bisection (h a.b.), hours post amputation (h p.a.).

Figure 9

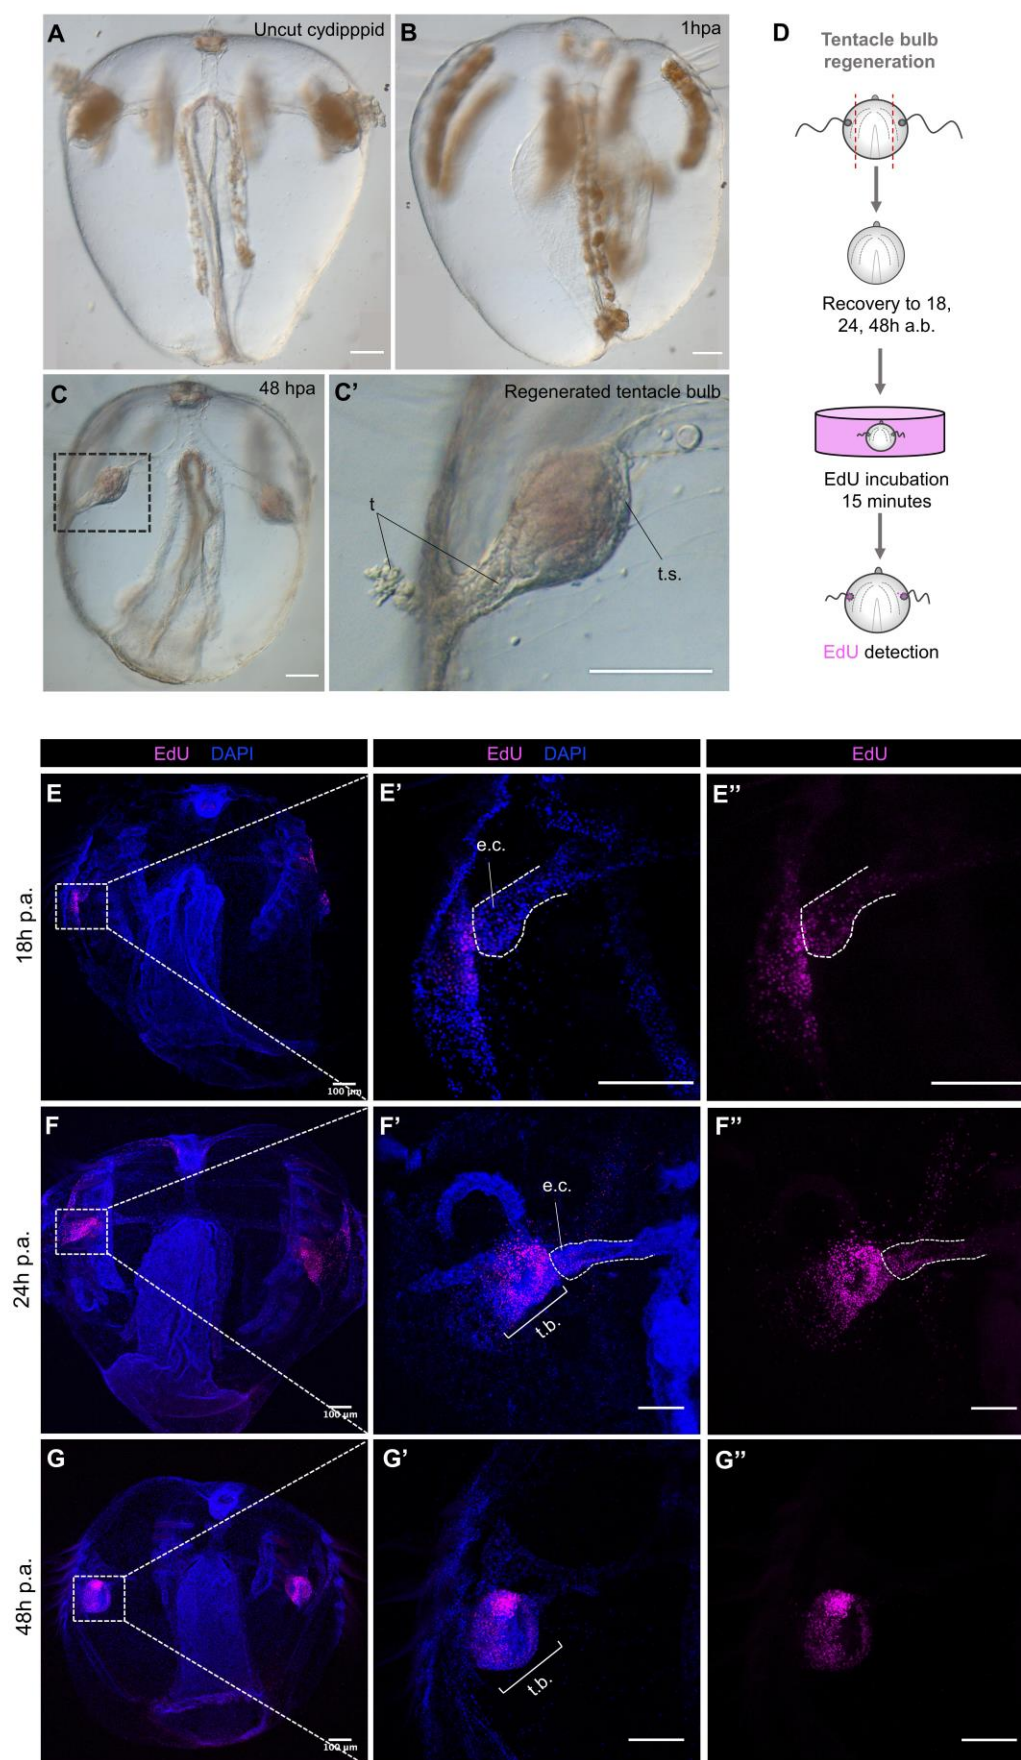



**Figure 9. Regeneration occurs after removal of the main regions of active cell proliferation. (A-C')** DIC images of an uncut cydippid (**A**) and cydippids after tentacle bulbs amputation (**B-C'**). Black dotted line rectangle in (**C**) show the area corresponding to higher magnification on the right. (**D**) Schematic of the EdU incorporation experiment in cydippids in which both tentacle bulbs were amputated. (**E-G''**) Confocal stack projections of cydippids in which the tentacle bulbs were amputated oriented in a lateral view at different time points post amputation. The labeling corresponding to each panel is listed at the top of the columns, and the time following amputation is listed to the left of the rows. Dotted line rectangles in (**E**), (**F**) and (**G**) show the area corresponding to higher magnifications on the right. Nuclei of S-phase cells are labeled with EdU (magenta) and all nuclei are counterstained with DAPI (blue). Scale bars = 100 $\mu$ m. Abbreviations: tentacle sheath (t.s.), tentacle (t), endodermal canal (e.c.), tentacle bulb (t.b.), hours after bisection (h a.b.), hours post amputation (h p.a.).

Figure 10

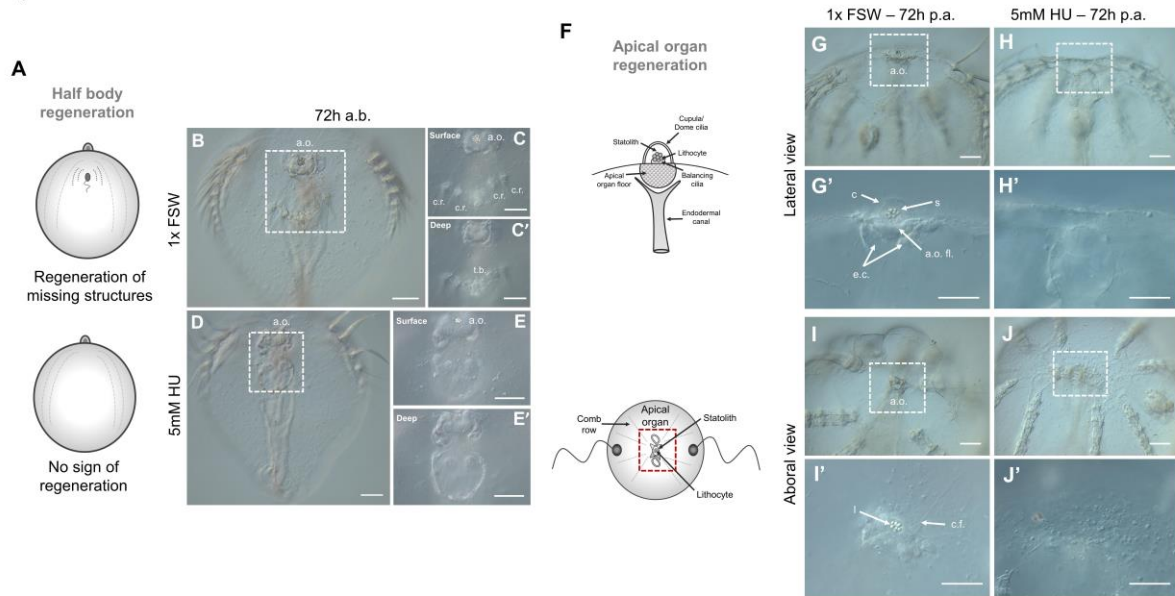

**Figure 10. Ctenophore regeneration does not occur in the absence of cell proliferation.** (A) Schematic representation of the regeneration state of cydippids shown in the panels on the right. Cartoons correspond to lateral views of the cydippid's body bisected in half through the oral-aboral axis showing the cut site in the first plane. (B-E') DIC images of bisected cydippids in a lateral view at 72 hab. The type of treatment corresponding to each panel is listed to the left of the rows. Dotted line rectangles in (B) and (D) show the area corresponding to higher magnifications on the right. Magnifications show surface (top) and deep (bottom) planes. Note that the wound site in treated cydippids is covered by a continuous epithelium but there is no sign of formation of missing structures. (F) Schematic representation of the apical sensory organ in lateral (top) and aboral (bottom) views. Red dotted rectangle at the bottom cartoon delimits the apical organ area shown in the images on the right. (G-H') DIC images of cydippids in which the apical organ was amputated at 72 hpa orientated in a lateral view. (I-J') DIC images of cydippids in which the apical organ was amputated at 72 hpa orientated in an aboral view. The type of treatment corresponding to each panel is listed to the top of the columns. Dotted line rectangles in (G), (H), (I) and (J) show the area corresponding to higher magnifications on the bottom. Note that treated cydippids show aggregation of cells around the surface of the wounded area although none of the missing apical organ structures are formed. Scale bars = 100  $\mu$ m. Abbreviations: hours after bisection (h a.b.), hours post amputation (h p.a.), apical organ (a.o.), comb row (c.r.), tentacle bulb (t.b.), statolith (s), cupula (c), apical organ floor (a.o. fl.), endodermal canal (e.c.), lithocyte (l), ciliated furrow (c.f.).

Figure 11

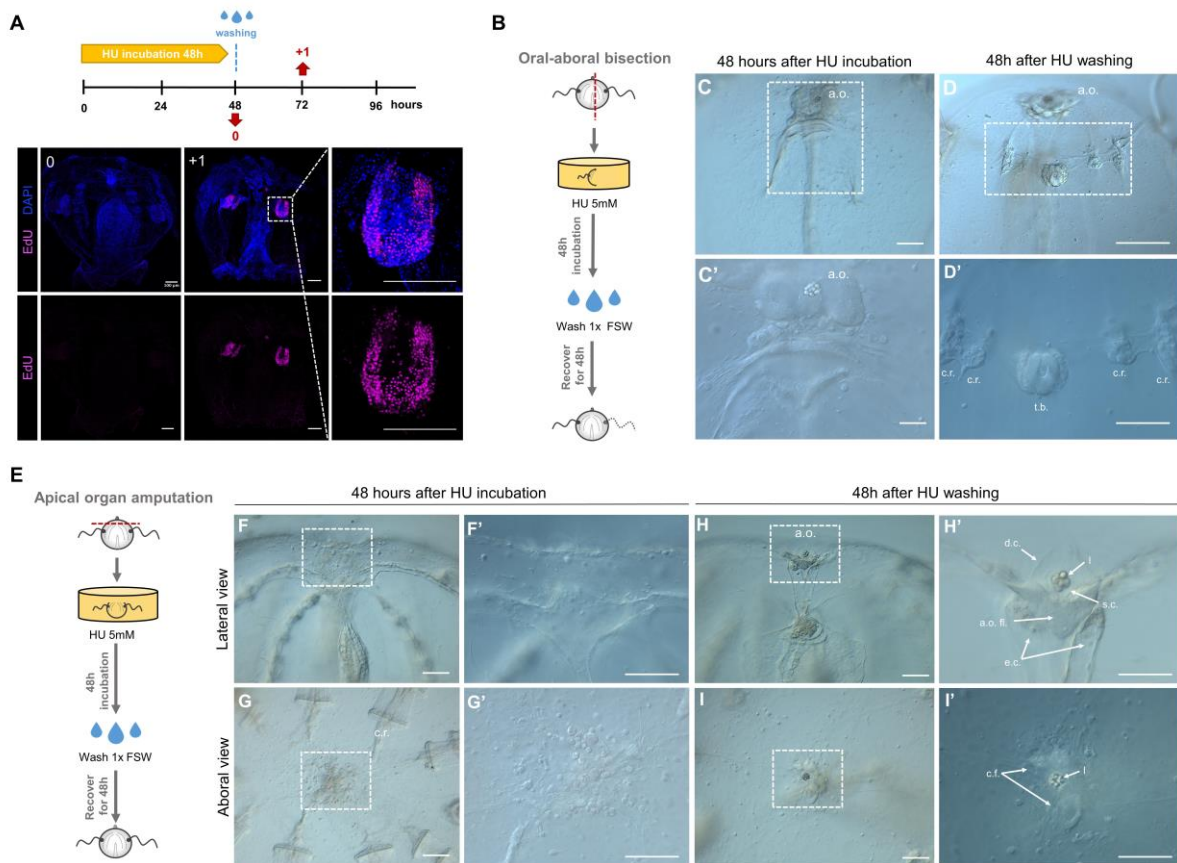

**Figure 11. Regenerative ability is recovered after HU treatment ends.** (A) Reversible S-phase arrest after HU treatment as detected by EdU labeling performed at the indicated time-points (red arrows). Nuclei of S-phase cells are labeled with EdU (magenta) and all nuclei are counterstained with DAPI (blue). Note that cells have already resumed cell cycle progression 1 day after HU wash (B) Schematic representation of HU treatment and wash experiment in bisected cydippids through the oral-aboral axis. (C-C') DIC images of bisected cydippids in lateral view showing the wound site at 48 hab (just after HU treatment and before washing). The dotted line rectangle in (C) shows the area corresponding to higher magnification at the bottom. Note that there is no sign of regeneration of the missing structures. (D-D') DIC images of bisected cydippids in lateral view showing the wound site at 96 hab (48h after HU wash). The dotted line rectangle in (D) shows the area corresponding to higher magnification at the bottom. Note that all missing structures (comb rows and tentacle bulb) are regenerated. (E) Schematic representation of HU treatment and wash experiment in cydippids in which the apical organ was amputated. (F-G') DIC images of amputated cydippids oriented in a lateral (top panels) and aboral (bottom panels) view showing the wound site at 48 hpa (just after HU treatment and before washing). Dotted line rectangles in (F) and (G) shows the area corresponding to higher magnification on the right. Note that there is no sign of regeneration of the missing structures. (H-I') DIC images of amputated cydippids oriented in a lateral (top panels) and aboral (bottom panels) view showing the wound site at 96 hpa (48h after HU wash). Dotted line rectangles in (H) and (I) show the area corresponding to higher magnification on the right. Note that all components of the apical organ are regenerated. Scale bars = 100  $\mu$ m. Abbreviations: hours after bisection (h a.b.), hours post amputation (h p.a.), apical organ (a.o.), comb row (c.r.), tentacle bulb (t.b.), dome cilia (d.c.), lithocyte (l), supporting cilia (s.c.), apical organ floor (a.o. fl.), endodermal canal (e.c.), ciliated furrows (c.f.).

Figure 12

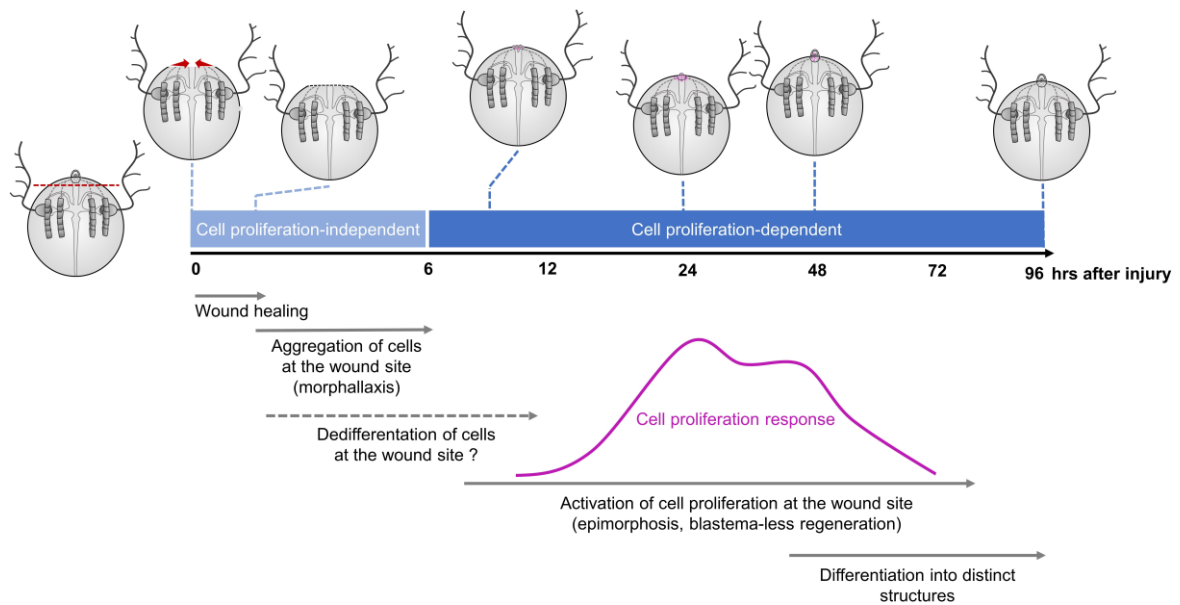

**Figure 12. Working model of ctenophore regeneration.** Timeline of the morphological and cellular events underlying ctenophore regeneration. Apical organ regeneration is used as example. Proliferating cells (EdU+) are colored in magenta. Wound closure is initiated immediately after surgery with the edges of the wound forming a round circumference that reduces in diameter until meeting and is completed within 1-2 hours after amputation. Reorganization of tissue including aggregation of round-shaped cells at the wound epithelium – potentially derived from dedifferentiation – events takes place during the first 6 hours after injury (Cell-proliferation independent phase). Cell proliferation is activated at the wound site between 6-12 hours after amputation and it reaches a maximum at 24 hours, when the primordia of the missing structures are formed. After this peak of cell proliferation, the number of proliferating cells at the wound site decreases while cells start to specify and differentiate into the final structures.
